# Supplementary material
Source: MDPI journal article supplement (https://www.mdpi.com/1996-1073/14/21/6957)
Supplement: s1 [file s1]

# How CO<sub>2</sub>-to-Diesel Technology Could Help Reach Net-Zero Emissions Targets: A Canadian Case Study

Andrew W. Ruttinger<sup>1</sup>, Miyuru Kannangara<sup>2</sup>, Jalil Shadbahr<sup>2,\*</sup>, Phil De Luna<sup>2</sup>, and Farid Bensebaa<sup>2</sup>

<sup>1</sup> Natural Resources Canada, Ottawa, Canada

<sup>2</sup> National Research Council of Canada, Ottawa, Canada

\* Corresponding Author: Jalil.Shadbahr@nrc-cnrc.gc.ca

---

## **Table of Contents**

|                                                                                                 |    |
|-------------------------------------------------------------------------------------------------|----|
| Process Simulation Assumptions . . . . .                                                        | 2  |
| Overall Mass and Energy Balance . . . . .                                                       | 3  |
| Techno-Economic Analysis and Life Cycle Assessment Data . . . . .                               | 3  |
| Additional Modelling Estimates and Assumptions . . . . .                                        | 5  |
| Incumbent Diesel Production Process . . . . .                                                   | 5  |
| Estimates for Diesel Production Process . . . . .                                               | 6  |
| 2026 Canada Energy Regulator Variables . . . . .                                                | 7  |
| Emissions Intensity by Source . . . . .                                                         | 7  |
| List of Learning Rates . . . . .                                                                | 8  |
| Diesel Demand . . . . .                                                                         | 9  |
| S-Curve Demand Projections . . . . .                                                            | 11 |
| Levelized Cost of Carbon Abatement for Policy Scenarios and Diesel Substitution Cases . . . . . | 14 |
| Emissions Avoided for Policy Scenarios and Diesel Substitution Cases . . . . .                  | 24 |
| References . . . . .                                                                            | 41 |

### Process Simulation Assumptions

Details of assumed operating parameters for simulation of different units are presented in this section. For the Amine based CO<sub>2</sub> capture unit, data were extracted from Rubin & Rao, 2002 [1] and data for Reverse water gas shift (RWGS) unit are according to Dimitriou *et al.*, 2015. [2] For the Fischer-Tropsch (FT), product recovery and energy recovery units, simulation parameters are presented in **Table S1**.

| Unit                                              | Simulation Parameters                                                                                                                                                                                                                                                                                            |
|---------------------------------------------------|------------------------------------------------------------------------------------------------------------------------------------------------------------------------------------------------------------------------------------------------------------------------------------------------------------------|
| Syngas preheater                                  | T <sub>in</sub> =335 K, T <sub>out</sub> =493 K, P=22.7 atm, CO=36437 kg/hr, H <sub>2</sub> =5229 kg/hr                                                                                                                                                                                                          |
| FT reactor                                        | Plug flow fixed bed reactor, T <sub>in</sub> =493 K, T <sub>out</sub> =861 K, P=22.7 atm, CO=36437 kg/hr, H <sub>2</sub> =5229 kg/hr, H <sub>2</sub> /CO (molar)=1.99, ΔP=3 atm, Mixed HC output=31039 kg/hr                                                                                                     |
| Mixed hydrocarbon expander                        | P <sub>in</sub> =19.78 atm, P <sub>out</sub> =10 atm, T <sub>in</sub> =861 K, T <sub>out</sub> =833 K                                                                                                                                                                                                            |
| Mixed hydrocarbon cooler                          | T <sub>in</sub> =833 K, T <sub>out</sub> =633 K, Mixed HC flowrate=31039 kg/hr, P=10 atm                                                                                                                                                                                                                         |
| Products recovery unit                            | Mixed HC flowrate=19891 kg/hr, T <sub>in</sub> =633 K, Output products: Diesel=11885 kg/hr, Kerosene=599 kg/hr, Gasoline=521 kg/hr, Light gaseous HC=6393 kg/hr, Wax=11147 kg/hr                                                                                                                                 |
| Hydrocracker unit (wax recovery)*                 | T=597 K, P=35 atm, Input wax flowrate=11147 kg/hr, H <sub>2</sub> /wax (wt/wt)=0.06, Output products: Diesel=2943 kg/hr, Kerosene=613 kg/hr, Gasoline=11 kg/hr, Wax=7580 kg/hr                                                                                                                                   |
| Boiler                                            | Input fuel (wax and light HC)=8679 kg/hr, Water=21500 kg/hr, T <sub>water</sub> =298 K, P <sub>water</sub> =122 atm, T <sub>steam</sub> =838 K, P <sub>steam</sub> =122 atm, Excess air for combustion=20%, T <sub>flue gas</sub> =1673 K, Flue gas=123562 kg/hr, P <sub>flue gas</sub> =1 atm                   |
| Steam turbine                                     | T <sub>steam,in</sub> =838 K, P <sub>steam,in</sub> =122 atm, T <sub>steam,out</sub> =373 K, P <sub>steam,out</sub> =1 atm                                                                                                                                                                                       |
| Heat exchanger 1                                  | T <sub>flue gas,in</sub> =1673 K, Flue gas <sub>in</sub> =123562 kg/hr, P <sub>flue gas</sub> =1 atm, T <sub>flue gas,out</sub> =320 K, Flue gas <sub>out</sub> =123562 kg/hr, Water=80000 kg/hr, T <sub>water</sub> =298 K, Steam=80000 kg/hr, T <sub>steam</sub> =383 K, Flue gas <sub>out</sub> =123562 kg/hr |
| Combustor                                         | Input fuel (wax and light HC)=5786 kg/hr, Excess air for combustion=20%, T <sub>flue gas</sub> =2096 K, Flue gas=82375 kg/hr, P=1 atm                                                                                                                                                                            |
| Heat Exchanger 2                                  | T <sub>flue gas,in</sub> =2096 K, Flue gas <sub>in</sub> =82375 kg/hr, P <sub>flue gas</sub> =1 atm, T <sub>flue gas,out</sub> =320 K, Flue gas <sub>out</sub> =123562 kg/hr, Water=48000 kg/hr, T <sub>water</sub> =298 K, T <sub>steam</sub> =973 K, Steam=48000 kg/hr, Flue gas <sub>out</sub> =82375 kg/hr   |
| *Design data from Bouchy <i>et al.</i> , 2009 [3] |                                                                                                                                                                                                                                                                                                                  |

**Table S1.** Fischer Tropsch, product recovery, and energy recovery simulation parameters

## Overall Mass and Energy Balance

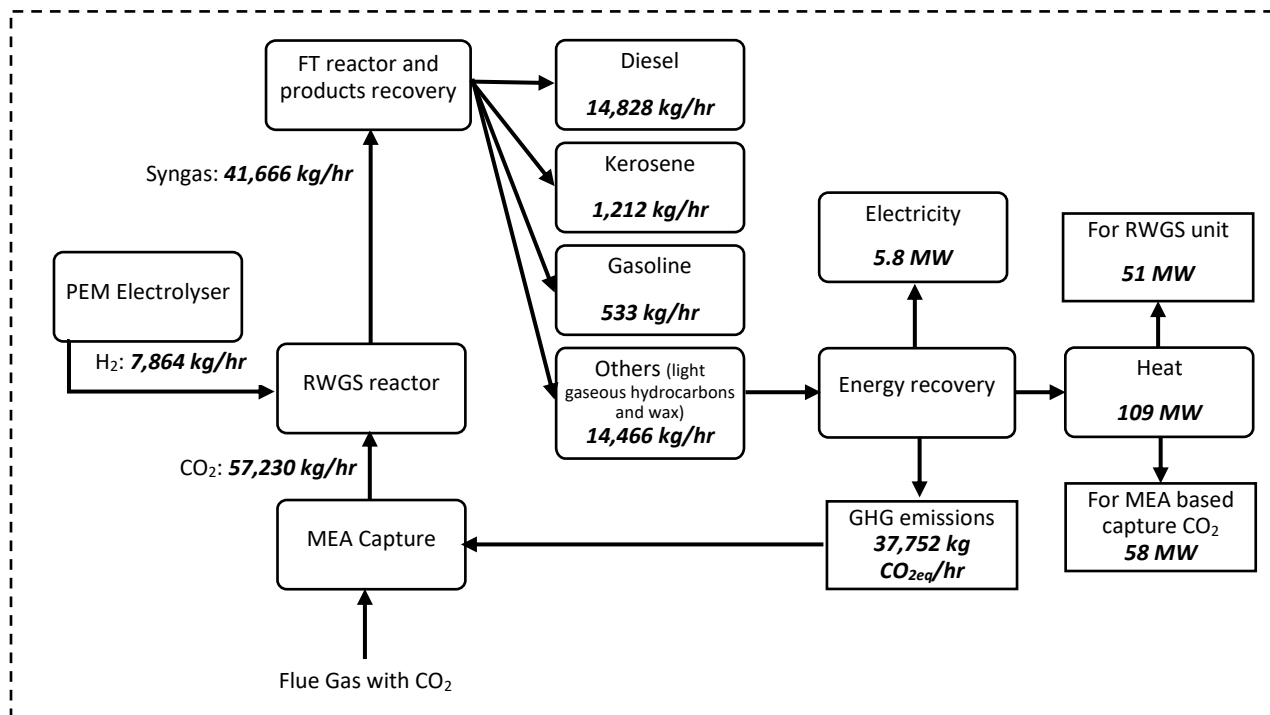

**Figure S1.** Overall mass and energy balance of the CO<sub>2</sub>-to-diesel process modelled in the present work.

## Techno-Economic Analysis and Life Cycle Assessment Data

A techno-economic analysis (TEA) was carried out based on previously developed methods. The equipment costs were evaluated using cost scaling methods. [4] The reference equipment costs are shown in **Table S2**. All equipment costs were converted into 2019 costs using chemical engineering plant cost index (CEPCI). Total installed purchased equipment cost (PEC) was evaluated by adding all the equipment costs. Cost factors of 33% PEC as additional direct costs and 50% of total direct costs as indirect costs to evaluate fixed capital investment (FCI) cost. [5] Also, an additional 5% of FCI was calculated as working capital to evaluate total capital investment cost. [2] **Table S3** shows the cost of electricity and water for operating the plant. Ratio factors was used to evaluate labor, maintenance and other overheads of OPEX cost. [6] An additional stack replacement cost based on 60% of original installed cost was used to represent. [7] A plant operation time of 8000 hours per year and discount rate of 7% for capital investment was employed, using previously developed formulae by the authors. [8]

**Table S2.** Reference cost values use to evaluate PEC.

| Process unit           | Reference cost (US\$M) | Reference capacity  | Reference year | Scaling factor | Installation factor | Sources                         |
|------------------------|------------------------|---------------------|----------------|----------------|---------------------|---------------------------------|
| PEM water electrolyzer | 0.307                  | 1 MW <sub>el</sub>  | 2015           | 1              | 1.33                | Mayyas <i>et al.</i> , 2019 [9] |
| Gas pre-heating HEX    | 1.15                   | 40 MW <sub>th</sub> | 1987           | 0.6            | 1                   |                                 |

|                                     |       |                                   |      |      |      |                                                     |
|-------------------------------------|-------|-----------------------------------|------|------|------|-----------------------------------------------------|
| Flue gas quench                     | 1.14  | 2390 t/d                          | 2007 | 0.6  | 1    | Swanson <i>et al.</i> , 2010 [10]                   |
| RWGS reactor                        | 0.45  | 2000 (CO+H <sub>2</sub> ) kmol/hr | 2002 | 0.6  | 1.7  | Rafati <i>et al.</i> , 2017 [11]                    |
| Amine based CO <sub>2</sub> capture | 20.5  | 2198 t/d                          | 2007 | 0.7  | 1    | Swanson <i>et al.</i> , 2010 [10]                   |
| Syngas compressor                   | 2.15  | 2 MW                              | 2007 | 0.67 | 1.7  |                                                     |
| FTS reactor                         | 2.5   | 2.5 mmscf/h                       | 2007 | 0.67 | 1.7  | Garret, 2012 [12]; Rafati <i>et al.</i> , 2017 [11] |
| Syngas cooler and condensing HX     | 0.8   | 40 MW                             | 1987 | 0.67 | 1.61 | Garret, 2012 [12]                                   |
| FT product upgrade and recovery     | 245.3 | 286 m <sup>3</sup> /h FT liquid   | 2002 | 0.7  | 1    | Rafati <i>et al.</i> , 2017 [11]                    |
| Steam generating heat recovery      | 2.5   | 24 MW <sub>th</sub>               | 2007 | 1    | 1    | Rafati <i>et al.</i> , 2017 [11]                    |
| Steam cycle                         | 15.1  | 30 MW <sub>e</sub>                | 2007 | 0.67 | 1    | Rafati <i>et al.</i> , 2017 [11]                    |
| Flue gas blower                     | 0.5   | 1.6 M GPM                         | 1998 | 0.6  | 1.7  | Loh <i>et al.</i> , 2002 [13]                       |
| PSA H <sub>2</sub> removal          | 51.49 | 9600 feed kmol/h                  | 2002 | 0.7  | 1    | Rafati <i>et al.</i> , 2017 [11]                    |

Based on capital, materials and utility costs, the remaining operating costs were evaluated using cost factor methods. [6] A summary of calculated values for Quebec in 2027 – at a capacity of 1 MtCO<sub>2</sub>eq/year - is provided in **Table S3**.

**Table S3.** Operating costs given in CA\$M.

| Description                       | Costs (CA\$M) |
|-----------------------------------|---------------|
| Material and utility costs        |               |
| - Electricity                     | 552.46        |
| - Water                           | 3.10          |
| Other operating costs             |               |
| - Operating labor                 | 2.21          |
| - Operating supervision           | 0.33          |
| - Maintenance labor               | 35.16         |
| - Maintenance material            | 35.16         |
| - Operating supplies              | 10.55         |
| - Laboratory charges              | 0.44          |
| - Insurances and taxes            | 35.16         |
| - Plant overhead                  | 22.62         |
| - Administrative cost             | 5.66          |
| - Distribution, marketing and R&D | 78.10         |
| Total annual operating cost       | 780.95        |

The carbon footprint of constructing and decommissioning of the pathway was assumed to be similar to an organic chemical plant that has been reported in the Ecoinvent life cycle inventory database. [14] This value corresponds to 378k tonnes of CO<sub>2</sub> after scaling based on product flow rates of the pathway and reference organics chemical plant. The carbon footprints of operational energy and materials are given in **Table S4**. The carbon footprint of diesel production up to plant gate was calculated considering all the emissions due to electricity and water use and plant construction and decommission.

**Table S4.** Cost and carbon footprint of utilities.

| Description | Cost             | Carbon footprint                               | Sources                          |
|-------------|------------------|------------------------------------------------|----------------------------------|
| Water       | 0.12/t           | $2.82 \times 10^{-5}$ kg CO <sub>2</sub> eq/kg | Wernet <i>et al.</i> , 2016 [14] |
| Electricity | Region Dependent | Region Dependent                               | CER, 2020 [15]                   |

#### **Additional Modelling Estimates and Assumptions**

We leverage TEA and life cycle assessment (LCA) provided in the preceding sections. PEM electrolyzer costs are estimated using NREL's cost manufacturing study assuming a production rate of 1000, 1 MW electrolyzers per year. [9] Emissions from construction of the electrolyzers were assumed to be encompassed by the estimate for emissions from construction of the facility. Lifetime emissions intensity for diesel was taken as 104.5 gCO<sub>2</sub>eq/MJ, [16] while the baseline emissions intensity for biodiesel was assumed to be 26 gCO<sub>2</sub>eq/MJ. [17] Emissions intensity for CO<sub>2</sub>-derived diesel was calculated using our LCA. Combustion emissions for diesel and biodiesel were taken as 71.73 gCO<sub>2</sub>eq/MJ and 5.92 gCO<sub>2</sub>eq/MJ, respectively. [18] Since reliable data is not available for combustion emissions associated with CO<sub>2</sub>-derived diesel, we take the diesel emissions intensity as a conservative estimate. The energy content of diesel was assumed to be 38.68 GJ/m<sup>3</sup>. [19] We assume a CO<sub>2</sub>-to-diesel plant life of 25 years and a discount rate of 7%. For the oil refinery capacity that is substituted for our CO<sub>2</sub>-to-diesel process, a plant life of 22.6 years with a depreciation rate of 0.118 is estimated based on depreciation profiles of oil refineries in Canada. [20] Costs for an oil refinery were estimated based on capacity to be replaced, with associated capital costs estimated at 15%. [21][22] The process is provided in **Figure S2**. A scaling factor of 0.55 for oil upgrading technology was used. [23] For simplicity, co-products during product refining and upgrade were assumed to be equivalent for both the CO<sub>2</sub>-to-diesel and oil refining process.

#### **Incumbent Diesel Production Process**

We base our incumbent technology off of an oil refinery with units that produce as much diesel and gasoline as possible. [21] The units and flow rates through the units, normalized to 1 BPD of diesel is provided in **Figure S2**. This is based off of a scheme provided in literature. [21] In the reference case, the production capacity is 23,454 BPD. [21]

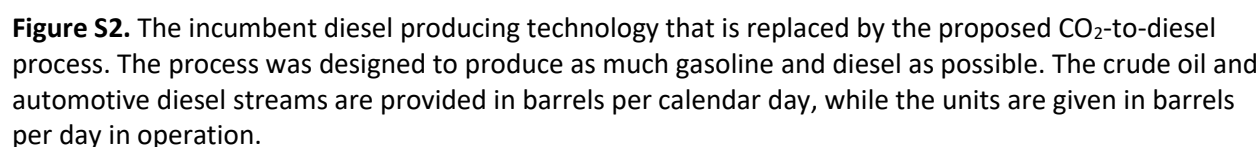

Estimates for unit costs and utility consumption were based off of values provided in literature and scaled to the required capacity. [21][22] Capital costs were scaled using a 0.55 scaling factor [23] and associated costs accounted for an additional 15% of capital costs. [21]

| Unit                  | Capital Cost<br>(2019 US\$/BPD) | Steam<br>(lbs/BPD) | Water<br>(gals/BPD) | Power<br>(kWh/BPD) | Fuel<br>(MMBtu/BPD) |
|-----------------------|---------------------------------|--------------------|---------------------|--------------------|---------------------|
| Light End Units       | 441                             | 25                 | 12                  | 0.4                | 0                   |
| Catalytic Reformer    | 3341                            | 50                 | 15                  | 12                 | 0.35                |
| Hydrotreater (Naptha) | 835                             | 0                  | 4                   | 6                  | 0.12                |
| Hydrotreater (Diesel) | 1285                            | 30                 | 8                   | 1.5                | 0.12                |

|                         |      |    |     |     |      |
|-------------------------|------|----|-----|-----|------|
| Wash Plants             | 182  | 1  | 2.5 | 0.4 | 0    |
| Naptha Splitters        | 386  | 0  | 9   | 0.4 | 0.1  |
| Thermal Crackers        | 2142 | 70 | 20  | 3   | 0.5  |
| Fluid Catalytic Cracker | 4241 | 20 | 20  | 7   | 0    |
| Crude Distillation      | 1477 | 19 | 20  | 0.2 | 0.09 |

### **2026 Canada Energy Regulator Variables**

For our first analysis, we investigate how learning rate effects the costs and energy consumption of the proposed CO<sub>2</sub>-to-diesel process. To isolate this effect from additional factors such as utility costs and emissions intensities for electricity generation, we assume constant values for these factors based on the 2026 Canada Energy Regulator (CER) projections. [15] These values are provided in **Table S6**.

**Table S6.** The 2026 Canada Energy Regulator values used to isolate the learning effects due to capacity increase of the proposed CO<sub>2</sub>-to-diesel process.

| Unit                                                      | 2026 CER Value |
|-----------------------------------------------------------|----------------|
| Electricity Price (CA\$/MWh)                              | 89.36          |
| Electricity Emissions Intensity (gCO <sub>2</sub> eq/kWh) | 95.74          |
| Steam Price (CA\$/kg)                                     | 0.03           |
| Gas Price (CA\$/GJ)                                       | 10.80          |
| Crude Oil Price (CA\$/bbl)                                | 72.60          |

### **Emissions Intensity by Source**

Emissions intensities for each region were determined based on the amount of electricity generated by source and the emissions intensity for each source of electricity generation. [15][24] The average efficiency for electricity generation by source was determined based on data from the International Energy Agency. [25] The emissions intensities used are provided in **Table S7**.

**Table S7.** The emissions intensity of electricity generation and efficiency of electricity generation used for this study.

| Source         | Emissions Intensity (gCO <sub>2</sub> eq/MJ) | Efficiency | Emissions Intensity (gCO <sub>2</sub> eq/kWh) |
|----------------|----------------------------------------------|------------|-----------------------------------------------|
| Solar          | 0                                            |            | 0                                             |
| Wind           | 0                                            |            | 0                                             |
| Hydro          | 0                                            |            | 0                                             |
| Nuclear        | 0                                            |            | 0                                             |
| Biomass        | 4.59                                         | 37.0%      | 44.64                                         |
| Natural Gas    | 49.88                                        | 34.5%      | 520.34                                        |
| Diesel         | 74.08                                        | 27.5%      | 971.19                                        |
| Heavy Fuel Oil | 74.58                                        | 27.5%      | 977.74                                        |
| Coal           | 90.87                                        | 40.2%      | 814.77                                        |

### List of Learning Rates

Learning rates for the capital costs of each unit, as well as the sub-components that make up the proton exchange membrane (PEM) electrolyzer and the Fischer-Tropsch (FT) reactor are provided in **Table S8**, along with the source it is derived from. Components for the PEM electrolyzer [9][26] and FT reactor [26] were taken from literature. Learning rates were based on either the same, or when not available, similar technology. Calculation of the final learning rate for these units was based on an average weighted by cost.

**Table S8.** The learning rates of each unit, along the sub-components for the PEM electrolyzer and the FT reactor.

| Component                                      | Sub-Component                 | Learning Rate | Source(s) |
|------------------------------------------------|-------------------------------|---------------|-----------|
| <b>PEM Electrolyzer</b>                        |                               | 12.9%         | [26]      |
|                                                | Stack Assembling & End Plates | 8%            | [26]      |
|                                                | Small Parts                   | 5%            | [26]      |
|                                                | MEA Manufacturing/Frame       | 8%            | [26]      |
|                                                | Catalyst Cathode/Anode        | 8%            | [26]      |
|                                                | Catalyst Coated Membrane      | 22%           | [26]      |
|                                                | Bipolar Plates                | 22%           | [26]      |
|                                                | Porous Transport Layer        | 22%           | [26]      |
|                                                | <b>Cell Stack Total</b>       | 16.4%         | [26]      |
|                                                | <b>Power Electronics</b>      | 12%           | [26]      |
|                                                | <b>Gas Conditioning</b>       | 7%            | [26]      |
|                                                | <b>Balance of Plant</b>       | 13%           | [26]      |
| <b>Gas Pre-Heater before RWGS reactor</b>      |                               | 4%            | [27]      |
| <b>Flue Gas Quench and Particulate Removal</b> |                               | 2%            | [27]      |
| <b>RWGS Reactor</b>                            |                               | 11%           | [26][29]  |
| <b>MEA Capture</b>                             |                               | 11%           | [30]      |
| <b>Syngas Feed Compressor</b>                  |                               | 5%            | [28]      |
| <b>FT Reactor</b>                              |                               | 12.3%         | [26]      |
|                                                | Reactor                       | 15%           | [26]      |
|                                                | Catalyst                      | 8%            | [26]      |
|                                                | Heat Management               | 15%           | [26]      |
|                                                | <b>Reactor Total</b>          | 13.9%         | [26]      |
|                                                | <b>Power Electronics</b>      | 12%           | [26]      |
|                                                | <b>Gas Conditioning</b>       | 7%            | [26]      |
|                                                | <b>Balance of Plant</b>       | 13%           | [26]      |
| <b>Syngas Cooler Water Condensing HX</b>       |                               | 4%            | [27]      |
| <b>FT Product Upgrading</b>                    |                               | 4.0%          | [28]      |



|                                |  |    |      |
|--------------------------------|--|----|------|
| <b>Boiler Steam Generation</b> |  | 1% | [27] |
| <b>Steam Cycle</b>             |  | 4% | [27] |

### **Diesel Demand**

The diesel demand used in this study are based on data from the CER 2020 Energy Futures Evolving Scenario. [15] Biodiesel demand was calculated from this CER data for biofuels, assuming a constant value of 11% of biofuel is biodiesel based on the 2018 composition of biofuel. [31] Projections for the CO<sub>2</sub>-derived diesel is determined based on our three policy scenarios. The overall demand over the period of 2026 to 2050 is provided in **Table S9**. All values are provided in PJ. The corresponding compositions of the diesel pool for each policy scenario are provided in **Table S10-S12**.

**Table S9.** Demand of each type of diesel for each year from 2026 to 2050 under each policy scenario. All values are provided in PJ.

| <b>Year</b> | <b>Diesel Demand</b> | <b>Biodiesel Demand</b> | <b>CO<sub>2</sub>-Derived Diesel (Existing Policy Scenario)</b> | <b>CO<sub>2</sub>-Derived Diesel (Growth Scenario)</b> | <b>CO<sub>2</sub>-Derived Diesel (Continued Policy Development Scenario)</b> |
|-------------|----------------------|-------------------------|-----------------------------------------------------------------|--------------------------------------------------------|------------------------------------------------------------------------------|
| <b>2026</b> | 756.09               | 13.23                   | 0.00                                                            | 0.00                                                   | 0.00                                                                         |
| <b>2027</b> | 750.78               | 14.14                   | 12.25                                                           | 12.25                                                  | 12.25                                                                        |
| <b>2028</b> | 740.12               | 15.35                   | 24.50                                                           | 24.50                                                  | 24.50                                                                        |
| <b>2029</b> | 727.61               | 17.22                   | 36.75                                                           | 36.75                                                  | 36.75                                                                        |
| <b>2030</b> | 713.48               | 19.20                   | 49.00                                                           | 49.00                                                  | 49.00                                                                        |
| <b>2031</b> | 705.44               | 19.25                   | 49.00                                                           | 49.98                                                  | 61.25                                                                        |
| <b>2032</b> | 694.08               | 19.31                   | 49.00                                                           | 50.98                                                  | 73.50                                                                        |
| <b>2033</b> | 686.07               | 19.35                   | 49.00                                                           | 52.00                                                  | 85.75                                                                        |
| <b>2034</b> | 677.15               | 19.46                   | 49.00                                                           | 53.04                                                  | 98.00                                                                        |
| <b>2035</b> | 668.25               | 19.57                   | 49.00                                                           | 54.10                                                  | 110.25                                                                       |
| <b>2036</b> | 655.11               | 19.51                   | 49.00                                                           | 55.18                                                  | 122.50                                                                       |
| <b>2037</b> | 646.22               | 19.45                   | 49.00                                                           | 56.29                                                  | 134.75                                                                       |
| <b>2038</b> | 637.74               | 19.40                   | 49.00                                                           | 57.41                                                  | 147.00                                                                       |
| <b>2039</b> | 629.57               | 19.36                   | 49.00                                                           | 58.56                                                  | 159.25                                                                       |
| <b>2040</b> | 620.87               | 19.32                   | 49.00                                                           | 59.73                                                  | 171.50                                                                       |
| <b>2041</b> | 610.90               | 19.54                   | 49.00                                                           | 60.93                                                  | 183.75                                                                       |
| <b>2042</b> | 600.26               | 19.76                   | 49.00                                                           | 62.14                                                  | 196.00                                                                       |
| <b>2043</b> | 588.79               | 19.98                   | 49.00                                                           | 63.39                                                  | 208.25                                                                       |
| <b>2044</b> | 576.56               | 20.21                   | 49.00                                                           | 64.65                                                  | 220.50                                                                       |
| <b>2045</b> | 563.26               | 20.43                   | 49.00                                                           | 65.95                                                  | 232.75                                                                       |
| <b>2046</b> | 548.83               | 20.64                   | 49.00                                                           | 67.27                                                  | 245.00                                                                       |
| <b>2047</b> | 533.34               | 20.85                   | 49.00                                                           | 68.61                                                  | 257.25                                                                       |
| <b>2048</b> | 516.70               | 21.05                   | 49.00                                                           | 69.98                                                  | 269.50                                                                       |
| <b>2049</b> | 498.98               | 21.24                   | 49.00                                                           | 71.38                                                  | 281.75                                                                       |
| <b>2050</b> | 480.05               | 21.41                   | 49.00                                                           | 72.81                                                  | 294.00                                                                       |

**Table S10.** Composition of the diesel pool for each year from 2026 to 2050 under each the Existing Policy Scenario. Numbers may not round up exactly to 1.0 due to rounding errors.

| <b>Year</b> | <b>Diesel</b> | <b>Biodiesel</b> | <b>CO<sub>2</sub>-Derived Diesel</b> |
|-------------|---------------|------------------|--------------------------------------|
| <b>2026</b> | 0.98          | 0.02             | 0.00                                 |

|      |      |      |      |
|------|------|------|------|
| 2027 | 0.97 | 0.02 | 0.02 |
| 2028 | 0.95 | 0.02 | 0.03 |
| 2029 | 0.93 | 0.02 | 0.05 |
| 2030 | 0.91 | 0.03 | 0.07 |
| 2031 | 0.91 | 0.03 | 0.07 |
| 2032 | 0.90 | 0.03 | 0.07 |
| 2033 | 0.90 | 0.03 | 0.07 |
| 2034 | 0.90 | 0.03 | 0.07 |
| 2035 | 0.90 | 0.03 | 0.07 |
| 2036 | 0.90 | 0.03 | 0.07 |
| 2037 | 0.90 | 0.03 | 0.07 |
| 2038 | 0.90 | 0.03 | 0.07 |
| 2039 | 0.89 | 0.03 | 0.08 |
| 2040 | 0.89 | 0.03 | 0.08 |
| 2041 | 0.89 | 0.03 | 0.08 |
| 2042 | 0.89 | 0.03 | 0.08 |
| 2043 | 0.89 | 0.03 | 0.08 |
| 2044 | 0.88 | 0.03 | 0.08 |
| 2045 | 0.88 | 0.04 | 0.08 |
| 2046 | 0.88 | 0.04 | 0.09 |
| 2047 | 0.87 | 0.04 | 0.09 |
| 2048 | 0.87 | 0.04 | 0.09 |
| 2049 | 0.86 | 0.04 | 0.09 |
| 2050 | 0.86 | 0.04 | 0.10 |

**Table S11.** Composition of the diesel pool for each year from 2026 to 2050 under each the Growth Scenario. Numbers may not round up exactly to 1.0 due to rounding errors.

| Year | Diesel | Biodiesel | CO <sub>2</sub> -Derived Diesel |
|------|--------|-----------|---------------------------------|
| 2026 | 0.98   | 0.02      | 0.00                            |
| 2027 | 0.97   | 0.02      | 0.02                            |
| 2028 | 0.95   | 0.02      | 0.03                            |
| 2029 | 0.93   | 0.02      | 0.05                            |
| 2030 | 0.91   | 0.03      | 0.07                            |
| 2031 | 0.90   | 0.03      | 0.07                            |
| 2032 | 0.90   | 0.03      | 0.07                            |
| 2033 | 0.90   | 0.03      | 0.07                            |
| 2034 | 0.90   | 0.03      | 0.08                            |
| 2035 | 0.89   | 0.03      | 0.08                            |
| 2036 | 0.89   | 0.03      | 0.08                            |
| 2037 | 0.89   | 0.03      | 0.08                            |
| 2038 | 0.88   | 0.03      | 0.09                            |
| 2039 | 0.88   | 0.03      | 0.09                            |
| 2040 | 0.88   | 0.03      | 0.09                            |
| 2041 | 0.87   | 0.03      | 0.10                            |
| 2042 | 0.87   | 0.03      | 0.10                            |
| 2043 | 0.86   | 0.03      | 0.10                            |

|             |      |      |      |
|-------------|------|------|------|
| <b>2044</b> | 0.86 | 0.03 | 0.11 |
| <b>2045</b> | 0.85 | 0.04 | 0.11 |
| <b>2046</b> | 0.85 | 0.04 | 0.12 |
| <b>2047</b> | 0.84 | 0.04 | 0.12 |
| <b>2048</b> | 0.83 | 0.04 | 0.13 |
| <b>2049</b> | 0.82 | 0.04 | 0.14 |
| <b>2050</b> | 0.81 | 0.04 | 0.15 |

**Table S12.** Composition of the diesel pool for each year from 2026 to 2050 under each the Continued Policy Development Scenario. Numbers may not round up exactly to 1.0 due to rounding errors.

| <b>Year</b> | <b>Diesel</b> | <b>Biodiesel</b> | <b>CO<sub>2</sub>-Derived Diesel</b> |
|-------------|---------------|------------------|--------------------------------------|
| <b>2026</b> | 0.98          | 0.02             | 0.00                                 |
| <b>2027</b> | 0.97          | 0.02             | 0.02                                 |
| <b>2028</b> | 0.95          | 0.02             | 0.03                                 |
| <b>2029</b> | 0.93          | 0.02             | 0.05                                 |
| <b>2030</b> | 0.91          | 0.03             | 0.07                                 |
| <b>2031</b> | 0.89          | 0.03             | 0.08                                 |
| <b>2032</b> | 0.87          | 0.03             | 0.10                                 |
| <b>2033</b> | 0.85          | 0.03             | 0.12                                 |
| <b>2034</b> | 0.83          | 0.03             | 0.14                                 |
| <b>2035</b> | 0.81          | 0.03             | 0.16                                 |
| <b>2036</b> | 0.79          | 0.03             | 0.18                                 |
| <b>2037</b> | 0.77          | 0.03             | 0.20                                 |
| <b>2038</b> | 0.75          | 0.03             | 0.22                                 |
| <b>2039</b> | 0.72          | 0.03             | 0.25                                 |
| <b>2040</b> | 0.70          | 0.03             | 0.27                                 |
| <b>2041</b> | 0.68          | 0.03             | 0.29                                 |
| <b>2042</b> | 0.65          | 0.03             | 0.32                                 |
| <b>2043</b> | 0.63          | 0.03             | 0.34                                 |
| <b>2044</b> | 0.60          | 0.03             | 0.37                                 |
| <b>2045</b> | 0.57          | 0.04             | 0.40                                 |
| <b>2046</b> | 0.53          | 0.04             | 0.43                                 |
| <b>2047</b> | 0.50          | 0.04             | 0.46                                 |
| <b>2048</b> | 0.46          | 0.04             | 0.50                                 |
| <b>2049</b> | 0.42          | 0.04             | 0.54                                 |
| <b>2050</b> | 0.37          | 0.04             | 0.59                                 |

### **S-Curve Demand Projections**

As described in the main text, based on linearly growing CO<sub>2</sub>-derived diesel projections, we fit S-curve distributions to determine the likely diffusion of the proposed CO<sub>2</sub>-to-diesel process. The difference between the S-curve projections and the scenario projections is made up through import/export of CO<sub>2</sub>-derived diesel. The cumulative capacity and growth per year under each policy scenario using the S-curve is provided in **Table S13-S15**.

**Table S13.** Composition of the diesel pool for each year from 2026 to 2050 under each the Existing Policy Scenario. The growth rate and saturated capacity are 26.0% and 49.00 PJ, respectively. All values are provided in PJ.

| <b>Year</b> | <b>Cumulative Capacity</b> | <b>Capacity Growth</b> | <b>Imports Needed</b> |
|-------------|----------------------------|------------------------|-----------------------|
| <b>2026</b> | 0.00                       | 10.02                  | 0.00                  |
| <b>2027</b> | 10.02                      | 2.24                   | 2.23                  |
| <b>2028</b> | 12.26                      | 2.55                   | 12.24                 |
| <b>2029</b> | 14.81                      | 2.82                   | 21.94                 |
| <b>2030</b> | 17.63                      | 3.03                   | 31.37                 |
| <b>2031</b> | 20.66                      | 3.16                   | 28.34                 |
| <b>2032</b> | 23.82                      | 3.18                   | 25.18                 |
| <b>2033</b> | 27.00                      | 3.10                   | 22.00                 |
| <b>2034</b> | 30.10                      | 2.92                   | 18.90                 |
| <b>2035</b> | 33.02                      | 2.67                   | 15.98                 |
| <b>2036</b> | 35.68                      | 2.37                   | 13.32                 |
| <b>2037</b> | 38.06                      | 2.05                   | 10.94                 |
| <b>2038</b> | 40.11                      | 1.74                   | 8.89                  |
| <b>2039</b> | 41.85                      | 1.45                   | 7.15                  |
| <b>2040</b> | 43.40                      | 1.19                   | 5.70                  |
| <b>2041</b> | 44.49                      | 0.96                   | 4.51                  |
| <b>2042</b> | 45.45                      | 0.77                   | 3.55                  |
| <b>2043</b> | 46.21                      | 0.61                   | 2.79                  |
| <b>2044</b> | 46.82                      | 0.48                   | 2.18                  |
| <b>2045</b> | 47.31                      | 0.38                   | 1.69                  |
| <b>2046</b> | 47.68                      | 0.30                   | 1.32                  |
| <b>2047</b> | 47.98                      | 0.23                   | 1.02                  |
| <b>2048</b> | 48.21                      | 0.18                   | 0.79                  |
| <b>2049</b> | 48.39                      | 0.14                   | 0.61                  |
| <b>2050</b> | 48.53                      | 0.00                   | 0.47                  |

**Table S14.** Composition of the diesel pool for each year from 2026 to 2050 under each the Growth Scenario. The growth rate and saturated capacity are 27.8% and 72.81 PJ, respectively. All values are provided in PJ.

| <b>Year</b> | <b>Cumulative Capacity</b> | <b>Capacity Growth</b> | <b>Imports Needed</b> |
|-------------|----------------------------|------------------------|-----------------------|
| <b>2026</b> | 0.00                       | 10.02                  | 0.00                  |
| <b>2027</b> | 10.02                      | 2.65                   | 2.23                  |
| <b>2028</b> | 12.68                      | 3.18                   | 11.82                 |
| <b>2029</b> | 15.85                      | 3.71                   | 20.90                 |
| <b>2030</b> | 19.56                      | 4.22                   | 29.44                 |
| <b>2031</b> | 23.78                      | 4.64                   | 26.20                 |
| <b>2032</b> | 28.42                      | 4.93                   | 22.56                 |
| <b>2033</b> | 33.36                      | 5.05                   | 18.64                 |
| <b>2034</b> | 38.40                      | 4.97                   | 14.64                 |
| <b>2035</b> | 43.47                      | 4.72                   | 10.73                 |
| <b>2036</b> | 48.09                      | 4.32                   | 7.09                  |
| <b>2037</b> | 52.41                      | 3.82                   | 3.88                  |

|             |       |      |       |
|-------------|-------|------|-------|
| <b>2038</b> | 56.23 | 3.29 | 1.18  |
| <b>2039</b> | 59.52 | 2.76 | -0.96 |
| <b>2040</b> | 62.27 | 2.27 | -2.54 |
| <b>2041</b> | 64.54 | 1.83 | -3.61 |
| <b>2042</b> | 66.37 | 1.46 | -4.22 |
| <b>2043</b> | 67.82 | 1.15 | -4.44 |
| <b>2044</b> | 68.97 | 0.89 | -4.32 |
| <b>2045</b> | 69.86 | 0.69 | -3.92 |
| <b>2046</b> | 70.56 | 0.53 | -3.29 |
| <b>2047</b> | 71.09 | 0.41 | -2.48 |
| <b>2048</b> | 71.50 | 0.31 | -1.52 |
| <b>2049</b> | 71.81 | 0.24 | -0.43 |
| <b>2050</b> | 72.05 | 0.00 | 0.76  |

**Table S15.** Composition of the diesel pool for each year from 2026 to 2050 under each the Continued Policy Development Scenario. The growth rate and saturated capacity are 34.4% and 294.00 PJ, respectively. All values are provided in PJ.

| <b>Year</b> | <b>Cumulative Capacity</b> | <b>Capacity Growth</b> | <b>Imports Needed</b> |
|-------------|----------------------------|------------------------|-----------------------|
| <b>2026</b> | 0.00                       | 10.02                  | 0.00                  |
| <b>2027</b> | 10.02                      | 3.92                   | 2.23                  |
| <b>2028</b> | 13.94                      | 5.35                   | 10.56                 |
| <b>2029</b> | 19.29                      | 7.21                   | 17.46                 |
| <b>2030</b> | 26.50                      | 9.55                   | 22.50                 |
| <b>2031</b> | 36.05                      | 12.36                  | 25.20                 |
| <b>2032</b> | 48.42                      | 15.55                  | 25.08                 |
| <b>2033</b> | 63.97                      | 18.87                  | 21.78                 |
| <b>2034</b> | 82.83                      | 21.90                  | 15.17                 |
| <b>2035</b> | 104.73                     | 24.15                  | 5.52                  |
| <b>2036</b> | 128.88                     | 25.19                  | -6.38                 |
| <b>2037</b> | 154.07                     | 24.78                  | -19.32                |
| <b>2038</b> | 178.85                     | 23.01                  | -31.85                |
| <b>2039</b> | 201.86                     | 20.26                  | -42.61                |
| <b>2040</b> | 222.12                     | 17.02                  | -50.62                |
| <b>2041</b> | 239.14                     | 13.73                  | -55.39                |
| <b>2042</b> | 252.88                     | 10.73                  | -56.88                |
| <b>2043</b> | 263.61                     | 8.18                   | -55.36                |
| <b>2044</b> | 271.79                     | 6.11                   | -51.29                |
| <b>2045</b> | 277.90                     | 4.50                   | -45.15                |
| <b>2046</b> | 282.40                     | 3.28                   | -37.40                |
| <b>2047</b> | 285.68                     | 2.37                   | -28.43                |
| <b>2048</b> | 288.05                     | 1.71                   | -18.55                |
| <b>2049</b> | 289.76                     | 1.22                   | -8.01                 |
| <b>2050</b> | 290.98                     | 0.00                   | 3.02                  |

### Levelized Cost of Carbon Abatement for Policy Scenarios and Diesel Substitution Cases

The levelized cost of carbon abatement (LCCA) for each region in Canada between 2027 and 2050 is provided in **Table S16-S29** for each policy scenario and case of diesel substitution.

**Table S16.** The LCCA between 2027 and 2050 for each policy scenario and fossil fuel diesel substitution and diesel pool substitution cases based on the Canada average values. All values are provided in CA\$/tCO<sub>2</sub>eq.

| Canada Average |                                 |                 |                                       |                          |                 |                                       |
|----------------|---------------------------------|-----------------|---------------------------------------|--------------------------|-----------------|---------------------------------------|
|                | Fossil Fuel Diesel Substitution |                 |                                       | Diesel Pool Substitution |                 |                                       |
| Year           | Existing Policy Scenario        | Growth Scenario | Continued Policy Development Scenario | Existing Policy Scenario | Growth Scenario | Continued Policy Development Scenario |
| 2027           | 663.10                          | 663.10          | 663.10                                | 703.50                   | 708.24          | 759.31                                |
| 2028           | 668.17                          | 666.09          | 658.74                                | 708.88                   | 711.44          | 754.46                                |
| 2029           | 665.57                          | 659.54          | 639.83                                | 706.10                   | 704.45          | 733.20                                |
| 2030           | 658.67                          | 647.72          | 613.71                                | 698.73                   | 691.79          | 703.83                                |
| 2031           | 648.79                          | 632.76          | 585.11                                | 688.15                   | 675.74          | 671.80                                |
| 2032           | 637.98                          | 617.09          | 556.96                                | 676.57                   | 658.93          | 640.40                                |
| 2033           | 627.45                          | 602.14          | 530.94                                | 665.29                   | 642.92          | 611.56                                |
| 2034           | 617.96                          | 588.79          | 508.00                                | 655.15                   | 628.66          | 586.33                                |
| 2035           | 609.87                          | 577.43          | 488.55                                | 646.51                   | 616.54          | 565.16                                |
| 2036           | 603.19                          | 568.03          | 472.49                                | 639.39                   | 606.56          | 547.89                                |
| 2037           | 597.83                          | 560.46          | 459.58                                | 633.69                   | 598.54          | 534.21                                |
| 2038           | 593.64                          | 554.50          | 449.46                                | 629.25                   | 592.26          | 523.69                                |
| 2039           | 590.45                          | 549.91          | 441.72                                | 625.87                   | 587.44          | 515.85                                |
| 2040           | 588.07                          | 546.42          | 435.92                                | 623.36                   | 583.81          | 510.15                                |
| 2041           | 586.36                          | 543.84          | 431.67                                | 621.57                   | 581.15          | 506.15                                |
| 2042           | 585.16                          | 541.96          | 428.60                                | 620.33                   | 579.23          | 503.41                                |
| 2043           | 584.36                          | 540.63          | 426.42                                | 619.52                   | 577.89          | 501.59                                |
| 2044           | 583.87                          | 539.71          | 424.90                                | 619.03                   | 576.99          | 500.44                                |
| 2045           | 583.61                          | 539.12          | 423.86                                | 618.78                   | 576.43          | 499.75                                |
| 2046           | 583.51                          | 538.76          | 423.18                                | 618.71                   | 576.11          | 499.38                                |
| 2047           | 583.54                          | 538.57          | 422.75                                | 618.76                   | 575.97          | 499.24                                |
| 2048           | 583.64                          | 538.52          | 422.50                                | 618.89                   | 575.97          | 499.24                                |
| 2049           | 583.80                          | 538.57          | 422.40                                | 619.08                   | 576.06          | 499.36                                |
| 2050           | 583.99                          | 538.69          | 422.41                                | 619.30                   | 576.23          | 499.57                                |

**Table S17.** The LCCA between 2027 and 2050 for each policy scenario and fossil fuel diesel substitution and diesel pool substitution cases based on the Newfoundland & Labrador values. All values are provided in CA\$/tCO<sub>2</sub>eq.

| Newfoundland & Labrador |                                 |                 |                                       |                          |                 |                                       |
|-------------------------|---------------------------------|-----------------|---------------------------------------|--------------------------|-----------------|---------------------------------------|
|                         | Fossil Fuel Diesel Substitution |                 |                                       | Diesel Pool Substitution |                 |                                       |
| Year                    | Existing Policy Scenario        | Growth Scenario | Continued Policy Development Scenario | Existing Policy Scenario | Growth Scenario | Continued Policy Development Scenario |
| 2027                    | 534.03                          | 534.03          | 534.03                                | 553.91                   | 556.19          | 579.95                                |

|      |        |        |        |        |        |        |
|------|--------|--------|--------|--------|--------|--------|
| 2028 | 539.64 | 538.76 | 535.38 | 559.84 | 561.27 | 581.99 |
| 2029 | 541.81 | 539.08 | 529.53 | 562.26 | 561.84 | 576.59 |
| 2030 | 542.10 | 536.96 | 519.88 | 562.75 | 559.90 | 567.30 |
| 2031 | 540.59 | 532.85 | 508.20 | 561.35 | 555.88 | 555.91 |
| 2032 | 538.32 | 528.03 | 496.07 | 559.16 | 551.10 | 544.08 |
| 2033 | 535.78 | 523.06 | 484.25 | 556.66 | 546.17 | 532.59 |
| 2034 | 533.42 | 518.53 | 473.50 | 554.33 | 541.66 | 522.23 |
| 2035 | 531.41 | 514.63 | 464.12 | 552.37 | 537.81 | 513.33 |
| 2036 | 529.83 | 511.45 | 456.28 | 550.83 | 534.68 | 506.04 |
| 2037 | 528.67 | 508.97 | 449.96 | 549.73 | 532.27 | 500.34 |
| 2038 | 527.90 | 507.11 | 445.05 | 549.01 | 530.50 | 496.08 |
| 2039 | 527.44 | 505.79 | 441.36 | 548.61 | 529.26 | 493.07 |
| 2040 | 527.23 | 504.89 | 438.69 | 548.46 | 528.46 | 491.06 |
| 2041 | 527.22 | 504.33 | 436.81 | 548.51 | 527.99 | 489.80 |
| 2042 | 527.34 | 504.01 | 435.52 | 548.69 | 527.76 | 489.09 |
| 2043 | 527.55 | 503.87 | 434.66 | 548.96 | 527.71 | 488.75 |
| 2044 | 527.82 | 503.86 | 434.12 | 549.29 | 527.78 | 488.66 |
| 2045 | 528.13 | 503.94 | 433.78 | 549.64 | 527.93 | 488.71 |
| 2046 | 528.44 | 504.07 | 433.59 | 550.00 | 528.12 | 488.85 |
| 2047 | 528.76 | 504.24 | 433.51 | 550.36 | 528.35 | 489.04 |
| 2048 | 529.07 | 504.43 | 433.50 | 550.70 | 528.59 | 489.25 |
| 2049 | 529.36 | 504.64 | 433.55 | 551.02 | 528.85 | 489.49 |
| 2050 | 529.63 | 504.85 | 433.64 | 551.32 | 529.10 | 489.74 |

**Table S18.** The LCCA between 2027 and 2050 for each policy scenario and fossil fuel diesel substitution and diesel pool substitution cases based on the Prince Edward Island values. All values are provided in CA\$/tCO<sub>2</sub>eq.

| Prince Edward Island |                                 |                 |                                       |                          |                 |                                       |
|----------------------|---------------------------------|-----------------|---------------------------------------|--------------------------|-----------------|---------------------------------------|
| Year                 | Fossil Fuel Diesel Substitution |                 |                                       | Diesel Pool Substitution |                 |                                       |
|                      | Existing Policy Scenario        | Growth Scenario | Continued Policy Development Scenario | Existing Policy Scenario | Growth Scenario | Continued Policy Development Scenario |
| 2027                 | 509.88                          | 509.88          | 509.88                                | 531.60                   | 534.11          | 560.41                                |
| 2028                 | 515.39                          | 514.28          | 510.16                                | 537.47                   | 538.87          | 561.31                                |
| 2029                 | 516.38                          | 512.98          | 501.45                                | 538.68                   | 537.77          | 552.73                                |
| 2030                 | 514.86                          | 508.49          | 487.99                                | 537.29                   | 533.35          | 539.15                                |
| 2031                 | 511.26                          | 501.74          | 472.31                                | 533.74                   | 526.55          | 523.26                                |
| 2032                 | 506.74                          | 494.09          | 456.06                                | 529.19                   | 518.80          | 506.76                                |
| 2033                 | 502.02                          | 486.41          | 440.36                                | 524.42                   | 511.01          | 490.87                                |
| 2034                 | 497.63                          | 479.35          | 426.05                                | 519.99                   | 503.86          | 476.46                                |
| 2035                 | 493.80                          | 473.19          | 413.49                                | 516.13                   | 497.62          | 463.93                                |
| 2036                 | 490.61                          | 468.01          | 402.83                                | 512.94                   | 492.41          | 453.44                                |
| 2037                 | 488.10                          | 463.83          | 394.12                                | 510.43                   | 488.23          | 445.02                                |
| 2038                 | 486.19                          | 460.57          | 387.22                                | 508.54                   | 484.99          | 438.51                                |
| 2039                 | 484.80                          | 458.08          | 381.90                                | 507.20                   | 482.56          | 433.66                                |
| 2040                 | 483.84                          | 456.25          | 377.92                                | 506.29                   | 480.79          | 430.18                                |

|             |        |        |        |        |        |        |
|-------------|--------|--------|--------|--------|--------|--------|
| <b>2041</b> | 483.23 | 454.94 | 375.00 | 505.73 | 479.56 | 427.78 |
| <b>2042</b> | 482.57 | 453.66 | 372.35 | 505.10 | 478.32 | 425.46 |
| <b>2043</b> | 481.95 | 452.51 | 370.09 | 504.48 | 477.18 | 423.42 |
| <b>2044</b> | 481.40 | 451.52 | 368.25 | 503.94 | 476.20 | 421.74 |
| <b>2045</b> | 481.05 | 450.83 | 366.96 | 503.60 | 475.53 | 420.61 |
| <b>2046</b> | 480.86 | 450.37 | 366.07 | 503.43 | 475.09 | 419.89 |
| <b>2047</b> | 480.79 | 450.09 | 365.48 | 503.37 | 474.84 | 419.46 |
| <b>2048</b> | 480.79 | 449.94 | 365.11 | 503.40 | 474.72 | 419.23 |
| <b>2049</b> | 480.86 | 449.90 | 364.90 | 503.48 | 474.70 | 419.15 |
| <b>2050</b> | 480.96 | 449.93 | 364.82 | 503.60 | 474.76 | 419.19 |

**Table S19.** The LCCA between 2027 and 2050 for each policy scenario and fossil fuel diesel substitution and diesel pool substitution cases based on the Nova Scotia values. A negative value is meaningless and indicates that no carbon is abated. All values are provided in CA\$/tCO<sub>2</sub>eq.

| <b>Nova Scotia</b> |                                        |                        |                                              |                                 |                        |                                              |
|--------------------|----------------------------------------|------------------------|----------------------------------------------|---------------------------------|------------------------|----------------------------------------------|
|                    | <b>Fossil Fuel Diesel Substitution</b> |                        |                                              | <b>Diesel Pool Substitution</b> |                        |                                              |
| <b>Year</b>        | <b>Existing Policy Scenario</b>        | <b>Growth Scenario</b> | <b>Continued Policy Development Scenario</b> | <b>Existing Policy Scenario</b> | <b>Growth Scenario</b> | <b>Continued Policy Development Scenario</b> |
| <b>2027</b>        | -846.39                                | -846.39                | -846.39                                      | -804.21                         | -799.83                | -758.59                                      |
| <b>2028</b>        | -878.05                                | -881.51                | -891.25                                      | -832.87                         | -831.12                | -793.46                                      |
| <b>2029</b>        | -922.71                                | -932.34                | -960.37                                      | -872.63                         | -875.50                | -844.46                                      |
| <b>2030</b>        | -979.50                                | -998.85                | -1057.86                                     | -922.65                         | -932.75                | -913.30                                      |
| <b>2031</b>        | -1045.66                               | -1079.40               | -1189.64                                     | -980.27                         | -1001.01               | -1001.57                                     |
| <b>2032</b>        | -1120.57                               | -1174.64               | -1367.41                                     | -1044.78                        | -1080.38               | -1113.12                                     |
| <b>2033</b>        | -1198.15                               | -1277.60               | -1590.82                                     | -1110.71                        | -1164.47               | -1241.36                                     |
| <b>2034</b>        | -1277.28                               | -1387.49               | -1876.53                                     | -1177.12                        | -1252.40               | -1388.89                                     |
| <b>2035</b>        | -1356.54                               | -1502.77               | -2247.56                                     | -1242.83                        | -1342.70               | -1557.45                                     |
| <b>2036</b>        | -1434.05                               | -1620.72               | -2732.72                                     | -1306.32                        | -1433.11               | -1746.05                                     |
| <b>2037</b>        | -1508.20                               | -1738.41               | -3371.58                                     | -1366.37                        | -1521.42               | -1951.85                                     |
| <b>2038</b>        | -1577.45                               | -1852.59               | -4213.62                                     | -1421.87                        | -1605.32               | -2168.51                                     |
| <b>2039</b>        | -1640.65                               | -1960.21               | -5319.77                                     | -1472.04                        | -1682.84               | -2387.17                                     |
| <b>2040</b>        | -1696.97                               | -2058.63               | -6755.81                                     | -1516.36                        | -1752.43               | -2597.03                                     |
| <b>2041</b>        | -1746.17                               | -2146.27               | -8593.12                                     | -1554.79                        | -1813.36               | -2789.00                                     |
| <b>2042</b>        | -1788.11                               | -2221.85               | -10864.88                                    | -1587.33                        | -1865.12               | -2954.40                                     |
| <b>2043</b>        | -1823.37                               | -2285.72               | -13588.99                                    | -1614.53                        | -1908.29               | -3091.18                                     |
| <b>2044</b>        | -1852.64                               | -2338.78               | -16733.65                                    | -1637.01                        | -1943.75               | -3200.32                                     |
| <b>2045</b>        | -1876.55                               | -2381.89               | -20160.35                                    | -1655.31                        | -1972.28               | -3283.66                                     |
| <b>2046</b>        | -1895.88                               | -2416.43               | -23685.09                                    | -1670.06                        | -1994.96               | -3345.46                                     |
| <b>2047</b>        | -1911.40                               | -2443.81               | -27097.90                                    | -1681.87                        | -2012.82               | -3390.24                                     |
| <b>2048</b>        | -1923.79                               | -2465.37               | -30219.07                                    | -1691.28                        | -2026.82               | -3422.24                                     |
| <b>2049</b>        | -1933.66                               | -2482.30               | -32926.44                                    | -1698.77                        | -2037.77               | -3444.90                                     |
| <b>2050</b>        | -1941.51                               | -2495.59               | -35173.82                                    | -1704.73                        | -2046.35               | -3460.98                                     |



**Table S20.** The LCCA between 2027 and 2050 for each policy scenario and fossil fuel diesel substitution and diesel pool substitution cases based on the New Brunswick values. All values are provided in CA\$/tCO<sub>2</sub>eq.

| <b>New Brunswick</b> |                                        |                        |                                              |                                 |                        |                                              |
|----------------------|----------------------------------------|------------------------|----------------------------------------------|---------------------------------|------------------------|----------------------------------------------|
|                      | <b>Fossil Fuel Diesel Substitution</b> |                        |                                              | <b>Diesel Pool Substitution</b> |                        |                                              |
| <b>Year</b>          | <b>Existing Policy Scenario</b>        | <b>Growth Scenario</b> | <b>Continued Policy Development Scenario</b> | <b>Existing Policy Scenario</b> | <b>Growth Scenario</b> | <b>Continued Policy Development Scenario</b> |
| <b>2027</b>          | 539.94                                 | 539.94                 | 539.94                                       | 564.67                          | 567.53                 | 597.70                                       |
| <b>2028</b>          | 544.67                                 | 543.30                 | 538.38                                       | 569.67                          | 571.13                 | 596.32                                       |
| <b>2029</b>          | 543.84                                 | 539.75                 | 526.25                                       | 568.87                          | 567.51                 | 583.51                                       |
| <b>2030</b>          | 539.98                                 | 532.44                 | 508.85                                       | 564.88                          | 559.93                 | 564.99                                       |
| <b>2031</b>          | 533.78                                 | 522.64                 | 489.25                                       | 558.43                          | 549.71                 | 544.15                                       |
| <b>2032</b>          | 526.42                                 | 511.73                 | 469.06                                       | 550.72                          | 538.29                 | 522.63                                       |
| <b>2033</b>          | 518.97                                 | 501.01                 | 449.93                                       | 542.92                          | 527.06                 | 502.27                                       |
| <b>2034</b>          | 512.09                                 | 491.21                 | 432.73                                       | 535.71                          | 516.80                 | 484.06                                       |
| <b>2035</b>          | 506.03                                 | 482.65                 | 417.82                                       | 529.36                          | 507.85                 | 468.35                                       |
| <b>2036</b>          | 500.89                                 | 475.40                 | 405.26                                       | 523.97                          | 500.27                 | 455.22                                       |
| <b>2037</b>          | 496.81                                 | 469.62                 | 395.26                                       | 519.70                          | 494.25                 | 444.92                                       |
| <b>2038</b>          | 493.65                                 | 465.10                 | 387.48                                       | 516.41                          | 489.57                 | 437.07                                       |
| <b>2039</b>          | 491.26                                 | 461.64                 | 381.58                                       | 513.93                          | 486.01                 | 431.25                                       |
| <b>2040</b>          | 489.51                                 | 459.06                 | 377.19                                       | 512.12                          | 483.36                 | 427.06                                       |
| <b>2041</b>          | 488.29                                 | 457.18                 | 374.04                                       | 510.86                          | 481.45                 | 424.18                                       |
| <b>2042</b>          | 487.24                                 | 455.58                 | 371.42                                       | 509.78                          | 479.82                 | 421.75                                       |
| <b>2043</b>          | 486.36                                 | 454.25                 | 369.31                                       | 508.87                          | 478.46                 | 419.79                                       |
| <b>2044</b>          | 485.67                                 | 453.19                 | 367.68                                       | 508.16                          | 477.39                 | 418.28                                       |
| <b>2045</b>          | 485.25                                 | 452.49                 | 366.57                                       | 507.72                          | 476.67                 | 417.33                                       |
| <b>2046</b>          | 485.01                                 | 452.03                 | 365.84                                       | 507.48                          | 476.22                 | 416.75                                       |
| <b>2047</b>          | 484.91                                 | 451.76                 | 365.37                                       | 507.38                          | 475.97                 | 416.43                                       |
| <b>2048</b>          | 484.90                                 | 451.63                 | 365.10                                       | 507.38                          | 475.86                 | 416.29                                       |
| <b>2049</b>          | 484.95                                 | 451.59                 | 364.96                                       | 507.45                          | 475.85                 | 416.28                                       |
| <b>2050</b>          | 485.05                                 | 451.64                 | 364.93                                       | 507.56                          | 475.91                 | 416.36                                       |

**Table S21.** The LCCA between 2027 and 2050 for each policy scenario and fossil fuel diesel substitution and diesel pool substitution cases based on the Quebec values. All values are provided in CA\$/tCO<sub>2</sub>eq.

| <b>Quebec</b> |                                        |                        |                                              |                                 |                        |                                              |
|---------------|----------------------------------------|------------------------|----------------------------------------------|---------------------------------|------------------------|----------------------------------------------|
|               | <b>Fossil Fuel Diesel Substitution</b> |                        |                                              | <b>Diesel Pool Substitution</b> |                        |                                              |
| <b>Year</b>   | <b>Existing Policy Scenario</b>        | <b>Growth Scenario</b> | <b>Continued Policy Development Scenario</b> | <b>Existing Policy Scenario</b> | <b>Growth Scenario</b> | <b>Continued Policy Development Scenario</b> |
| <b>2027</b>   | 295.43                                 | 295.43                 | 295.43                                       | 306.30                          | 307.55                 | 320.54                                       |
| <b>2028</b>   | 301.14                                 | 300.43                 | 297.72                                       | 312.29                          | 312.84                 | 323.34                                       |
| <b>2029</b>   | 303.53                                 | 301.26                 | 293.50                                       | 314.86                          | 313.84                 | 319.29                                       |
| <b>2030</b>   | 304.09                                 | 299.78                 | 285.87                                       | 315.55                          | 312.45                 | 311.66                                       |
| <b>2031</b>   | 302.84                                 | 296.33                 | 276.35                                       | 314.36                          | 309.01                 | 302.02                                       |
| <b>2032</b>   | 300.78                                 | 292.11                 | 266.36                                       | 312.31                          | 304.75                 | 291.89                                       |

|             |        |        |        |        |        |        |
|-------------|--------|--------|--------|--------|--------|--------|
| <b>2033</b> | 298.37 | 287.67 | 256.55 | 309.89 | 300.25 | 281.92 |
| <b>2034</b> | 296.06 | 283.52 | 247.59 | 307.56 | 296.05 | 272.85 |
| <b>2035</b> | 294.03 | 279.88 | 239.74 | 305.51 | 292.37 | 264.94 |
| <b>2036</b> | 292.35 | 276.84 | 233.12 | 303.84 | 289.31 | 258.34 |
| <b>2037</b> | 291.06 | 274.41 | 227.74 | 302.54 | 286.86 | 253.03 |
| <b>2038</b> | 290.10 | 272.52 | 223.49 | 301.60 | 284.98 | 248.92 |
| <b>2039</b> | 289.46 | 271.11 | 220.25 | 300.97 | 283.59 | 245.85 |
| <b>2040</b> | 289.06 | 270.10 | 217.84 | 300.59 | 282.60 | 243.65 |
| <b>2041</b> | 288.85 | 269.40 | 216.10 | 300.42 | 281.94 | 242.12 |
| <b>2042</b> | 288.80 | 268.95 | 214.86 | 300.39 | 281.52 | 241.09 |
| <b>2043</b> | 288.86 | 268.69 | 214.00 | 300.48 | 281.29 | 240.44 |
| <b>2044</b> | 288.99 | 268.56 | 213.43 | 300.64 | 281.20 | 240.05 |
| <b>2045</b> | 289.18 | 268.53 | 213.05 | 300.86 | 281.21 | 239.83 |
| <b>2046</b> | 289.40 | 268.58 | 212.82 | 301.10 | 281.29 | 239.75 |
| <b>2047</b> | 289.63 | 268.67 | 212.70 | 301.36 | 281.42 | 239.75 |
| <b>2048</b> | 289.87 | 268.80 | 212.66 | 301.62 | 281.58 | 239.81 |
| <b>2049</b> | 290.11 | 268.97 | 212.68 | 301.88 | 281.77 | 239.93 |
| <b>2050</b> | 290.34 | 269.15 | 212.76 | 302.13 | 281.97 | 240.09 |

**Table S22.** The LCCA between 2027 and 2050 for each policy scenario and fossil fuel diesel substitution and diesel pool substitution cases based on the Ontario values. All values are provided in CA\$/tCO<sub>2</sub>eq.

| <b>Ontario</b> |                                        |                        |                                              |                                 |                        |                                              |
|----------------|----------------------------------------|------------------------|----------------------------------------------|---------------------------------|------------------------|----------------------------------------------|
|                | <b>Fossil Fuel Diesel Substitution</b> |                        |                                              | <b>Diesel Pool Substitution</b> |                        |                                              |
| <b>Year</b>    | <b>Existing Policy Scenario</b>        | <b>Growth Scenario</b> | <b>Continued Policy Development Scenario</b> | <b>Existing Policy Scenario</b> | <b>Growth Scenario</b> | <b>Continued Policy Development Scenario</b> |
| <b>2027</b>    | 745.56                                 | 745.56                 | 745.56                                       | 777.42                          | 781.09                 | 819.67                                       |
| <b>2028</b>    | 749.63                                 | 748.15                 | 742.81                                       | 781.76                          | 783.93                 | 817.24                                       |
| <b>2029</b>    | 748.53                                 | 744.21                 | 729.73                                       | 780.77                          | 780.03                 | 803.91                                       |
| <b>2030</b>    | 743.90                                 | 735.87                 | 710.23                                       | 776.06                          | 771.50                 | 783.66                                       |
| <b>2031</b>    | 737.22                                 | 725.32                 | 688.73                                       | 769.19                          | 760.63                 | 761.38                                       |
| <b>2032</b>    | 729.64                                 | 713.94                 | 666.87                                       | 761.35                          | 748.86                 | 738.75                                       |
| <b>2033</b>    | 722.34                                 | 703.14                 | 646.56                                       | 753.80                          | 737.70                 | 717.87                                       |
| <b>2034</b>    | 715.83                                 | 693.54                 | 628.53                                       | 747.07                          | 727.81                 | 699.54                                       |
| <b>2035</b>    | 710.57                                 | 685.69                 | 613.55                                       | 741.65                          | 719.76                 | 684.61                                       |
| <b>2036</b>    | 706.44                                 | 679.43                 | 601.39                                       | 737.43                          | 713.39                 | 672.80                                       |
| <b>2037</b>    | 703.33                                 | 674.60                 | 591.81                                       | 734.27                          | 708.51                 | 663.77                                       |
| <b>2038</b>    | 701.06                                 | 670.96                 | 584.46                                       | 731.98                          | 704.88                 | 657.12                                       |
| <b>2039</b>    | 699.48                                 | 668.31                 | 578.99                                       | 730.41                          | 702.27                 | 652.44                                       |
| <b>2040</b>    | 698.44                                 | 666.42                 | 575.03                                       | 729.40                          | 700.46                 | 649.31                                       |
| <b>2041</b>    | 697.80                                 | 665.13                 | 572.25                                       | 728.80                          | 699.25                 | 647.34                                       |
| <b>2042</b>    | 697.47                                 | 664.29                 | 570.34                                       | 728.53                          | 698.51                 | 646.20                                       |
| <b>2043</b>    | 697.36                                 | 663.78                 | 569.06                                       | 728.47                          | 698.09                 | 645.62                                       |
| <b>2044</b>    | 697.41                                 | 663.51                 | 568.23                                       | 728.57                          | 697.91                 | 645.41                                       |
| <b>2045</b>    | 697.55                                 | 663.40                 | 567.70                                       | 728.77                          | 697.89                 | 645.42                                       |
| <b>2046</b>    | 697.75                                 | 663.40                 | 567.39                                       | 729.03                          | 697.98                 | 645.57                                       |

|             |        |        |        |        |        |        |
|-------------|--------|--------|--------|--------|--------|--------|
| <b>2047</b> | 697.99 | 663.49 | 567.23 | 729.31 | 698.13 | 645.78 |
| <b>2048</b> | 698.25 | 663.62 | 567.17 | 729.61 | 698.33 | 646.04 |
| <b>2049</b> | 698.51 | 663.79 | 567.19 | 729.91 | 698.56 | 646.32 |
| <b>2050</b> | 698.76 | 663.99 | 567.27 | 730.20 | 698.81 | 646.61 |

**Table S23.** The LCCA between 2027 and 2050 for each policy scenario and fossil fuel diesel substitution and diesel pool substitution cases based on the Manitoba values. All values are provided in CA\$/tCO<sub>2</sub>eq.

| <b>Manitoba</b> |                                        |                        |                                              |                                 |                        |                                              |
|-----------------|----------------------------------------|------------------------|----------------------------------------------|---------------------------------|------------------------|----------------------------------------------|
|                 | <b>Fossil Fuel Diesel Substitution</b> |                        |                                              | <b>Diesel Pool Substitution</b> |                        |                                              |
| <b>Year</b>     | <b>Existing Policy Scenario</b>        | <b>Growth Scenario</b> | <b>Continued Policy Development Scenario</b> | <b>Existing Policy Scenario</b> | <b>Growth Scenario</b> | <b>Continued Policy Development Scenario</b> |
| <b>2027</b>     | 291.84                                 | 291.84                 | 291.84                                       | 302.41                          | 303.62                 | 316.24                                       |
| <b>2028</b>     | 297.48                                 | 296.79                 | 294.15                                       | 308.33                          | 308.87                 | 319.07                                       |
| <b>2029</b>     | 299.87                                 | 297.65                 | 290.06                                       | 310.90                          | 309.90                 | 315.17                                       |
| <b>2030</b>     | 300.44                                 | 296.21                 | 282.59                                       | 311.60                          | 308.56                 | 307.72                                       |
| <b>2031</b>     | 299.19                                 | 292.80                 | 273.18                                       | 310.40                          | 305.15                 | 298.22                                       |
| <b>2032</b>     | 297.11                                 | 288.58                 | 263.26                                       | 308.34                          | 300.90                 | 288.17                                       |
| <b>2033</b>     | 294.66                                 | 284.11                 | 253.48                                       | 305.88                          | 296.38                 | 278.24                                       |
| <b>2034</b>     | 292.29                                 | 279.92                 | 244.49                                       | 303.50                          | 292.14                 | 269.14                                       |
| <b>2035</b>     | 290.19                                 | 276.22                 | 236.58                                       | 301.39                          | 288.40                 | 261.17                                       |
| <b>2036</b>     | 288.45                                 | 273.11                 | 229.88                                       | 299.64                          | 285.26                 | 254.49                                       |
| <b>2037</b>     | 287.08                                 | 270.59                 | 224.41                                       | 298.28                          | 282.74                 | 249.08                                       |
| <b>2038</b>     | 286.06                                 | 268.63                 | 220.07                                       | 297.27                          | 280.78                 | 244.87                                       |
| <b>2039</b>     | 285.34                                 | 267.15                 | 216.73                                       | 296.57                          | 279.31                 | 241.69                                       |
| <b>2040</b>     | 284.88                                 | 266.07                 | 214.23                                       | 296.13                          | 278.26                 | 239.38                                       |
| <b>2041</b>     | 284.62                                 | 265.31                 | 212.39                                       | 295.89                          | 277.53                 | 237.75                                       |
| <b>2042</b>     | 284.52                                 | 264.81                 | 211.09                                       | 295.82                          | 277.06                 | 236.64                                       |
| <b>2043</b>     | 284.54                                 | 264.50                 | 210.18                                       | 295.86                          | 276.79                 | 235.93                                       |
| <b>2044</b>     | 284.64                                 | 264.34                 | 209.56                                       | 296.00                          | 276.66                 | 235.49                                       |
| <b>2045</b>     | 284.80                                 | 264.28                 | 209.16                                       | 296.18                          | 276.64                 | 235.24                                       |
| <b>2046</b>     | 285.00                                 | 264.31                 | 208.91                                       | 296.41                          | 276.70                 | 235.13                                       |
| <b>2047</b>     | 285.22                                 | 264.39                 | 208.77                                       | 296.65                          | 276.81                 | 235.11                                       |
| <b>2048</b>     | 285.45                                 | 264.51                 | 208.72                                       | 296.90                          | 276.96                 | 235.16                                       |
| <b>2049</b>     | 285.67                                 | 264.66                 | 208.73                                       | 297.14                          | 277.13                 | 235.26                                       |
| <b>2050</b>     | 285.89                                 | 264.83                 | 208.80                                       | 297.38                          | 277.33                 | 235.41                                       |

**Table S24.** The LCCA between 2027 and 2050 for each policy scenario and fossil fuel diesel substitution and diesel pool substitution cases based on the Saskatchewan values. A negative value is meaningless and indicates that no carbon is abated. All values are provided in CA\$/tCO<sub>2</sub>eq.

| <b>Saskatchewan</b> |                                        |                        |                                              |                                 |                        |                                              |
|---------------------|----------------------------------------|------------------------|----------------------------------------------|---------------------------------|------------------------|----------------------------------------------|
|                     | <b>Fossil Fuel Diesel Substitution</b> |                        |                                              | <b>Diesel Pool Substitution</b> |                        |                                              |
| <b>Year</b>         | <b>Existing Policy Scenario</b>        | <b>Growth Scenario</b> | <b>Continued Policy Development Scenario</b> | <b>Existing Policy Scenario</b> | <b>Growth Scenario</b> | <b>Continued Policy Development Scenario</b> |
| <b>2027</b>         | -945.15                                | -945.15                | -945.15                                      | -860.85                         | -852.49                | -777.22                                      |

|             |          |            |           |          |          |           |
|-------------|----------|------------|-----------|----------|----------|-----------|
| <b>2028</b> | -998.41  | -1004.28   | -1021.39  | -905.74  | -901.01  | -827.18   |
| <b>2029</b> | -1072.06 | -1088.88   | -1140.94  | -965.75  | -967.59  | -897.64   |
| <b>2030</b> | -1167.41 | -1203.00   | -1322.82  | -1041.55 | -1054.47 | -994.67   |
| <b>2031</b> | -1283.26 | -1349.98   | -1604.35  | -1131.12 | -1162.12 | -1126.66  |
| <b>2032</b> | -1423.80 | -1541.22   | -2076.66  | -1236.62 | -1296.11 | -1311.11  |
| <b>2033</b> | -1590.89 | -1788.77   | -2973.63  | -1357.87 | -1460.24 | -1573.05  |
| <b>2034</b> | -1788.81 | -2113.90   | -5238.31  | -1496.14 | -1661.66 | -1964.36  |
| <b>2035</b> | -2018.61 | -2541.69   | -19590.11 | -1649.90 | -1904.91 | -2578.70  |
| <b>2036</b> | -2279.67 | -3106.52   | 12750.10  | -1816.35 | -2193.40 | -3621.87  |
| <b>2037</b> | -2569.17 | -3856.25   | 5155.79   | -1991.50 | -2528.41 | -5648.74  |
| <b>2038</b> | -2881.62 | -4857.35   | 3408.59   | -2170.30 | -2907.63 | -10824.20 |
| <b>2039</b> | -3206.55 | -6191.22   | 2664.30   | -2345.86 | -3320.76 | -42850.91 |
| <b>2040</b> | -3534.61 | -7983.27   | 2266.88   | -2513.29 | -3756.87 | 31795.25  |
| <b>2041</b> | -3856.42 | -10420.22  | 2029.08   | -2668.73 | -4202.51 | 13524.54  |
| <b>2042</b> | -4163.05 | -13784.77  | 1877.32   | -2809.39 | -4642.58 | 9414.93   |
| <b>2043</b> | -4446.06 | -18499.83  | 1777.08   | -2933.24 | -5060.57 | 7684.22   |
| <b>2044</b> | -4700.45 | -25274.38  | 1709.18   | -3040.04 | -5444.45 | 6775.06   |
| <b>2045</b> | -4922.48 | -35277.05  | 1662.82   | -3129.96 | -5783.93 | 6248.00   |
| <b>2046</b> | -5112.35 | -50774.69  | 1630.83   | -3204.59 | -6076.00 | 5922.95   |
| <b>2047</b> | -5271.54 | -76566.83  | 1608.74   | -3265.64 | -6320.75 | 5716.28   |
| <b>2048</b> | -5403.04 | -125170.84 | 1593.50   | -3315.10 | -6521.74 | 5582.55   |
| <b>2049</b> | -5510.14 | -242078.44 | 1583.12   | -3354.78 | -6683.74 | 5495.96   |
| <b>2050</b> | -5596.50 | -831187.19 | 1576.20   | -3386.43 | -6812.66 | 5440.31   |

**Table S25.** The LCCA between 2027 and 2050 for each policy scenario and fossil fuel diesel substitution and diesel pool substitution cases based on the Alberta values. A negative value is meaningless and indicates that no carbon is abated. All values are provided in CA\$/tCO<sub>2</sub>eq.

| <b>Alberta</b> |                                        |                        |                                              |                                 |                        |                                              |
|----------------|----------------------------------------|------------------------|----------------------------------------------|---------------------------------|------------------------|----------------------------------------------|
| <b>Year</b>    | <b>Fossil Fuel Diesel Substitution</b> |                        |                                              | <b>Diesel Pool Substitution</b> |                        |                                              |
|                | <b>Existing Policy Scenario</b>        | <b>Growth Scenario</b> | <b>Continued Policy Development Scenario</b> | <b>Existing Policy Scenario</b> | <b>Growth Scenario</b> | <b>Continued Policy Development Scenario</b> |
| <b>2027</b>    | -412.38                                | -412.38                | -412.38                                      | -397.83                         | -396.29                | -381.59                                      |
| <b>2028</b>    | -425.51                                | -426.29                | -428.19                                      | -410.16                         | -409.20                | -394.86                                      |
| <b>2029</b>    | -439.90                                | -441.62                | -446.04                                      | -423.46                         | -423.14                | -408.90                                      |
| <b>2030</b>    | -455.64                                | -458.63                | -466.84                                      | -437.88                         | -438.41                | -424.54                                      |
| <b>2031</b>    | -471.24                                | -475.94                | -490.00                                      | -452.04                         | -453.74                | -441.23                                      |
| <b>2032</b>    | -486.71                                | -493.58                | -515.75                                      | -465.99                         | -469.21                | -459.09                                      |
| <b>2033</b>    | -501.58                                | -510.97                | -543.37                                      | -479.31                         | -484.32                | -477.48                                      |
| <b>2034</b>    | -515.78                                | -527.98                | -572.78                                      | -491.97                         | -498.98                | -496.30                                      |
| <b>2035</b>    | -529.13                                | -544.31                | -603.42                                      | -503.82                         | -512.96                | -515.18                                      |
| <b>2036</b>    | -541.48                                | -559.70                | -634.58                                      | -514.76                         | -526.05                | -533.66                                      |
| <b>2037</b>    | -552.72                                | -573.88                | -665.28                                      | -524.69                         | -538.06                | -551.20                                      |
| <b>2038</b>    | -562.81                                | -586.71                | -694.54                                      | -533.58                         | -548.88                | -567.35                                      |
| <b>2039</b>    | -571.73                                | -598.10                | -721.46                                      | -541.42                         | -558.44                | -581.70                                      |
| <b>2040</b>    | -579.54                                | -608.06                | -745.48                                      | -548.29                         | -566.78                | -594.12                                      |

|             |         |         |         |         |         |         |
|-------------|---------|---------|---------|---------|---------|---------|
| <b>2041</b> | -586.23 | -616.56 | -765.93 | -554.17 | -573.88 | -604.35 |
| <b>2042</b> | -591.93 | -623.72 | -782.86 | -559.17 | -579.84 | -612.58 |
| <b>2043</b> | -596.73 | -629.67 | -796.45 | -563.38 | -584.79 | -619.00 |
| <b>2044</b> | -600.74 | -634.57 | -807.15 | -566.90 | -588.85 | -623.92 |
| <b>2045</b> | -604.06 | -638.56 | -815.38 | -569.82 | -592.16 | -627.60 |
| <b>2046</b> | -606.81 | -641.80 | -821.63 | -572.24 | -594.84 | -630.33 |
| <b>2047</b> | -609.06 | -644.41 | -826.33 | -574.22 | -597.01 | -632.34 |
| <b>2048</b> | -610.92 | -646.53 | -829.87 | -575.85 | -598.77 | -633.83 |
| <b>2049</b> | -612.44 | -648.26 | -832.56 | -577.19 | -600.20 | -634.97 |
| <b>2050</b> | -613.70 | -649.68 | -834.66 | -578.30 | -601.39 | -635.88 |

**Table S26.** The LCCA between 2027 and 2050 for each policy scenario and fossil fuel diesel substitution and diesel pool substitution cases based on the British Columbia values. All values are provided in CA\$/tCO<sub>2</sub>eq.

| <b>British Columbia</b> |                                        |                        |                                              |                                 |                        |                                              |
|-------------------------|----------------------------------------|------------------------|----------------------------------------------|---------------------------------|------------------------|----------------------------------------------|
|                         | <b>Fossil Fuel Diesel Substitution</b> |                        |                                              | <b>Diesel Pool Substitution</b> |                        |                                              |
| <b>Year</b>             | <b>Existing Policy Scenario</b>        | <b>Growth Scenario</b> | <b>Continued Policy Development Scenario</b> | <b>Existing Policy Scenario</b> | <b>Growth Scenario</b> | <b>Continued Policy Development Scenario</b> |
| <b>2027</b>             | 517.38                                 | 517.38                 | 517.38                                       | 538.51                          | 540.93                 | 566.40                                       |
| <b>2028</b>             | 522.87                                 | 521.83                 | 517.93                                       | 544.33                          | 545.73                 | 567.58                                       |
| <b>2029</b>             | 524.15                                 | 520.95                 | 510.02                                       | 545.84                          | 545.06                 | 559.89                                       |
| <b>2030</b>             | 523.10                                 | 517.10                 | 497.65                                       | 544.94                          | 541.31                 | 547.54                                       |
| <b>2031</b>             | 519.93                                 | 510.92                 | 482.91                                       | 541.81                          | 535.11                 | 532.68                                       |
| <b>2032</b>             | 515.84                                 | 503.84                 | 467.58                                       | 537.70                          | 527.95                 | 517.20                                       |
| <b>2033</b>             | 511.43                                 | 496.61                 | 452.61                                       | 533.25                          | 520.61                 | 502.09                                       |
| <b>2034</b>             | 507.28                                 | 489.90                 | 438.89                                       | 529.04                          | 513.79                 | 488.30                                       |
| <b>2035</b>             | 503.61                                 | 483.99                 | 426.81                                       | 525.33                          | 507.80                 | 476.25                                       |
| <b>2036</b>             | 500.53                                 | 478.99                 | 416.54                                       | 522.22                          | 502.75                 | 466.13                                       |
| <b>2037</b>             | 498.04                                 | 474.91                 | 408.11                                       | 519.72                          | 498.65                 | 457.94                                       |
| <b>2038</b>             | 496.11                                 | 471.68                 | 401.38                                       | 517.79                          | 495.41                 | 451.55                                       |
| <b>2039</b>             | 494.68                                 | 469.19                 | 396.18                                       | 516.36                          | 492.94                 | 446.73                                       |
| <b>2040</b>             | 493.65                                 | 467.32                 | 392.26                                       | 515.36                          | 491.11                 | 443.24                                       |
| <b>2041</b>             | 492.95                                 | 465.95                 | 389.37                                       | 514.69                          | 489.78                 | 440.78                                       |
| <b>2042</b>             | 492.52                                 | 464.98                 | 387.28                                       | 514.29                          | 488.87                 | 439.12                                       |
| <b>2043</b>             | 492.28                                 | 464.32                 | 385.80                                       | 514.09                          | 488.26                 | 438.03                                       |
| <b>2044</b>             | 492.20                                 | 463.89                 | 384.77                                       | 514.04                          | 487.89                 | 437.36                                       |
| <b>2045</b>             | 492.22                                 | 463.64                 | 384.06                                       | 514.10                          | 487.69                 | 436.97                                       |
| <b>2046</b>             | 492.31                                 | 463.52                 | 383.60                                       | 514.23                          | 487.62                 | 436.78                                       |
| <b>2047</b>             | 492.45                                 | 463.49                 | 383.31                                       | 514.40                          | 487.64                 | 436.72                                       |
| <b>2048</b>             | 492.63                                 | 463.54                 | 383.16                                       | 514.61                          | 487.73                 | 436.76                                       |
| <b>2049</b>             | 492.82                                 | 463.63                 | 383.11                                       | 514.83                          | 487.87                 | 436.87                                       |
| <b>2050</b>             | 493.02                                 | 463.77                 | 383.13                                       | 515.06                          | 488.05                 | 437.04                                       |

**Table S27.** The LCCA between 2027 and 2050 for each policy scenario and fossil fuel diesel substitution and diesel pool substitution cases based on the Yukon values. All values are provided in CA\$/tCO<sub>2</sub>eq.

| Yukon |                                 |                 |                                       |                          |                 |                                       |
|-------|---------------------------------|-----------------|---------------------------------------|--------------------------|-----------------|---------------------------------------|
|       | Fossil Fuel Diesel Substitution |                 |                                       | Diesel Pool Substitution |                 |                                       |
| Year  | Existing Policy Scenario        | Growth Scenario | Continued Policy Development Scenario | Existing Policy Scenario | Growth Scenario | Continued Policy Development Scenario |
| 2027  | 666.68                          | 666.68          | 666.68                                | 699.09                   | 702.85          | 742.66                                |
| 2028  | 669.78                          | 667.96          | 661.65                                | 702.35                   | 704.21          | 737.25                                |
| 2029  | 665.54                          | 660.23          | 643.19                                | 697.86                   | 696.04          | 717.01                                |
| 2030  | 658.80                          | 649.40          | 620.52                                | 690.79                   | 684.66          | 692.47                                |
| 2031  | 650.18                          | 636.62          | 596.49                                | 681.74                   | 671.24          | 666.70                                |
| 2032  | 641.20                          | 623.69          | 573.21                                | 672.32                   | 657.67          | 641.90                                |
| 2033  | 632.53                          | 611.38          | 551.52                                | 663.22                   | 644.78          | 618.94                                |
| 2034  | 624.70                          | 600.34          | 532.18                                | 655.03                   | 633.23          | 598.62                                |
| 2035  | 617.92                          | 590.79          | 515.45                                | 647.92                   | 623.26          | 581.17                                |
| 2036  | 612.22                          | 582.75          | 501.35                                | 641.95                   | 614.88          | 566.62                                |
| 2037  | 607.54                          | 576.15          | 489.79                                | 637.06                   | 608.02          | 554.83                                |
| 2038  | 603.79                          | 570.84          | 480.56                                | 633.15                   | 602.51          | 545.55                                |
| 2039  | 600.85                          | 566.65          | 473.36                                | 630.09                   | 598.18          | 538.45                                |
| 2040  | 598.59                          | 563.39          | 467.85                                | 627.74                   | 594.84          | 533.16                                |
| 2041  | 596.88                          | 560.91          | 463.72                                | 625.98                   | 592.30          | 529.31                                |
| 2042  | 595.70                          | 559.12          | 460.79                                | 624.77                   | 590.49          | 526.73                                |
| 2043  | 594.91                          | 557.86          | 458.74                                | 623.97                   | 589.24          | 525.05                                |
| 2044  | 594.41                          | 557.00          | 457.33                                | 623.48                   | 588.41          | 523.99                                |
| 2045  | 594.13                          | 556.44          | 456.37                                | 623.21                   | 587.88          | 523.37                                |
| 2046  | 594.01                          | 556.09          | 455.73                                | 623.11                   | 587.57          | 523.03                                |
| 2047  | 593.99                          | 555.90          | 455.33                                | 623.12                   | 587.42          | 522.89                                |
| 2048  | 594.05                          | 555.83          | 455.10                                | 623.20                   | 587.39          | 522.89                                |
| 2049  | 594.16                          | 555.84          | 454.99                                | 623.34                   | 587.45          | 522.98                                |
| 2050  | 594.30                          | 555.93          | 454.99                                | 623.50                   | 587.57          | 523.14                                |

**Table S28.** The LCCA between 2027 and 2050 for each policy scenario and fossil fuel diesel substitution and diesel pool substitution cases based on the Northwest Territories values. All values are provided in CA\$/tCO<sub>2</sub>eq.

| Northwest Territories |                                 |                 |                                       |                          |                 |                                       |
|-----------------------|---------------------------------|-----------------|---------------------------------------|--------------------------|-----------------|---------------------------------------|
|                       | Fossil Fuel Diesel Substitution |                 |                                       | Diesel Pool Substitution |                 |                                       |
| Year                  | Existing Policy Scenario        | Growth Scenario | Continued Policy Development Scenario | Existing Policy Scenario | Growth Scenario | Continued Policy Development Scenario |
| 2027                  | 5006.75                         | 5006.75         | 5006.75                               | 7459.08                  | 7883.51         | 18232.98                              |
| 2028                  | 4612.92                         | 4527.91         | 4280.12                               | 6608.22                  | 6757.70         | 11485.84                              |
| 2029                  | 4035.96                         | 3861.87         | 3407.95                               | 5499.01                  | 5402.02         | 7055.32                               |
| 2030                  | 3567.26                         | 3338.66         | 2787.30                               | 4681.43                  | 4459.77         | 5008.15                               |
| 2031                  | 3189.83                         | 2928.97         | 2336.03                               | 4068.61                  | 3783.06         | 3847.30                               |
| 2032                  | 2889.58                         | 2609.98         | 2001.88                               | 3606.35                  | 3287.96         | 3113.23                               |
| 2033                  | 2651.11                         | 2360.88         | 1749.87                               | 3253.71                  | 2918.81         | 2616.08                               |
| 2034                  | 2461.86                         | 2165.96         | 1557.68                               | 2982.24                  | 2639.71         | 2264.59                               |

|      |         |         |         |         |         |         |
|------|---------|---------|---------|---------|---------|---------|
| 2035 | 2311.46 | 2012.99 | 1410.00 | 2771.48 | 2426.33 | 2009.08 |
| 2036 | 2191.64 | 1892.53 | 1295.99 | 2606.58 | 2261.62 | 1819.88 |
| 2037 | 2095.97 | 1797.45 | 1207.89 | 2476.73 | 2133.58 | 1678.24 |
| 2038 | 2019.55 | 1722.37 | 1140.01 | 2374.13 | 2033.67 | 1571.82 |
| 2039 | 1958.45 | 1663.02 | 1087.89 | 2292.79 | 1955.44 | 1491.75 |
| 2040 | 1909.54 | 1616.07 | 1047.98 | 2228.12 | 1894.01 | 1431.49 |
| 2041 | 1870.48 | 1579.02 | 1017.64 | 2176.75 | 1845.83 | 1386.37 |
| 2042 | 1841.36 | 1551.75 | 996.37  | 2138.68 | 1810.67 | 1355.83 |
| 2043 | 1819.56 | 1531.58 | 981.39  | 2110.33 | 1784.87 | 1335.10 |
| 2044 | 1803.24 | 1516.67 | 970.85  | 2089.19 | 1765.91 | 1321.07 |
| 2045 | 1791.02 | 1505.64 | 963.44  | 2073.41 | 1751.98 | 1311.62 |
| 2046 | 1781.88 | 1497.50 | 958.24  | 2061.65 | 1741.77 | 1305.32 |
| 2047 | 1775.10 | 1491.54 | 954.65  | 2052.93 | 1734.35 | 1301.22 |
| 2048 | 1770.08 | 1487.22 | 952.20  | 2046.50 | 1728.99 | 1298.63 |
| 2049 | 1766.41 | 1484.14 | 950.59  | 2041.80 | 1725.20 | 1297.11 |
| 2050 | 1763.75 | 1481.99 | 949.59  | 2038.40 | 1722.58 | 1296.33 |

**Table S29.** The LCCA between 2027 and 2050 for each policy scenario and fossil fuel diesel substitution and diesel pool substitution cases based on the Nunavut values. A negative value is meaningless and indicates that no carbon is abated. All values are provided in CA\$/tCO<sub>2</sub>eq.

| Nunavut |                                 |                 |                                       |                          |                 |                                       |
|---------|---------------------------------|-----------------|---------------------------------------|--------------------------|-----------------|---------------------------------------|
| Year    | Fossil Fuel Diesel Substitution |                 |                                       | Diesel Pool Substitution |                 |                                       |
|         | Existing Policy Scenario        | Growth Scenario | Continued Policy Development Scenario | Existing Policy Scenario | Growth Scenario | Continued Policy Development Scenario |
| 2027    | -119.25                         | -119.25         | -119.25                               | -118.42                  | -118.34         | -117.45                               |
| 2028    | -120.65                         | -120.60         | -120.38                               | -119.81                  | -119.67         | -118.53                               |
| 2029    | -121.58                         | -121.38         | -120.67                               | -120.72                  | -120.42         | -118.74                               |
| 2030    | -122.26                         | -121.83         | -120.50                               | -121.38                  | -120.85         | -118.48                               |
| 2031    | -122.60                         | -121.95         | -120.02                               | -121.71                  | -120.94         | -117.91                               |
| 2032    | -122.78                         | -121.89         | -119.41                               | -121.86                  | -120.85         | -117.20                               |
| 2033    | -122.84                         | -121.72         | -118.73                               | -121.91                  | -120.66         | -116.41                               |
| 2034    | -122.85                         | -121.53         | -118.07                               | -121.91                  | -120.45         | -115.65                               |
| 2035    | -122.85                         | -121.35         | -117.48                               | -121.89                  | -120.25         | -114.95                               |
| 2036    | -122.85                         | -121.19         | -116.96                               | -121.89                  | -120.07         | -114.33                               |
| 2037    | -122.87                         | -121.07         | -116.54                               | -121.89                  | -119.94         | -113.82                               |
| 2038    | -122.91                         | -120.99         | -116.21                               | -121.92                  | -119.84         | -113.41                               |
| 2039    | -122.96                         | -120.94         | -115.97                               | -121.96                  | -119.78         | -113.08                               |
| 2040    | -123.02                         | -120.92         | -115.80                               | -122.02                  | -119.75         | -112.84                               |
| 2041    | -123.09                         | -120.93         | -115.67                               | -122.08                  | -119.75         | -112.66                               |
| 2042    | -123.17                         | -120.95         | -115.59                               | -122.15                  | -119.76         | -112.53                               |
| 2043    | -123.25                         | -120.98         | -115.54                               | -122.23                  | -119.78         | -112.43                               |
| 2044    | -123.33                         | -121.02         | -115.51                               | -122.31                  | -119.81         | -112.37                               |
| 2045    | -123.41                         | -121.06         | -115.49                               | -122.38                  | -119.85         | -112.33                               |
| 2046    | -123.48                         | -121.11         | -115.49                               | -122.46                  | -119.90         | -112.31                               |
| 2047    | -123.56                         | -121.16         | -115.50                               | -122.53                  | -119.94         | -112.30                               |

|             |         |         |         |         |         |         |
|-------------|---------|---------|---------|---------|---------|---------|
| <b>2048</b> | -123.63 | -121.21 | -115.52 | -122.59 | -119.99 | -112.30 |
| <b>2049</b> | -123.69 | -121.26 | -115.54 | -122.66 | -120.04 | -112.31 |
| <b>2050</b> | -123.75 | -121.31 | -115.58 | -122.71 | -120.09 | -112.34 |

### **Emissions Avoided for Policy Scenarios and Diesel Substitution Cases**

The cumulative emissions avoided for each region in Canada between 2027 and 2075 is provided in **Table S30-S43** for each policy scenario and case of diesel substitution.

**Table S30.** The emissions avoided between 2027 and 2075 for each policy scenario and fossil fuel diesel substitution and diesel pool substitution cases based on the Canada average values. All values are provided in MtCO<sub>2</sub>eq.

| <b>Canada Average</b> |                                        |                        |                                              |                                 |                        |                                              |
|-----------------------|----------------------------------------|------------------------|----------------------------------------------|---------------------------------|------------------------|----------------------------------------------|
|                       | <b>Fossil Fuel Diesel Substitution</b> |                        |                                              | <b>Diesel Pool Substitution</b> |                        |                                              |
| <b>Year</b>           | <b>Existing Policy Scenario</b>        | <b>Growth Scenario</b> | <b>Continued Policy Development Scenario</b> | <b>Existing Policy Scenario</b> | <b>Growth Scenario</b> | <b>Continued Policy Development Scenario</b> |
| <b>2027</b>           | 0.79                                   | 0.79                   | 0.79                                         | 0.74                            | 0.74                   | 0.69                                         |
| <b>2028</b>           | 1.75                                   | 1.78                   | 1.89                                         | 1.65                            | 1.67                   | 1.65                                         |
| <b>2029</b>           | 2.93                                   | 3.05                   | 3.44                                         | 2.76                            | 2.85                   | 3.00                                         |
| <b>2030</b>           | 4.34                                   | 4.63                   | 5.61                                         | 4.09                            | 4.33                   | 4.90                                         |
| <b>2031</b>           | 6.02                                   | 6.57                   | 8.63                                         | 5.67                            | 6.15                   | 7.52                                         |
| <b>2032</b>           | 7.97                                   | 8.93                   | 12.75                                        | 7.52                            | 8.36                   | 11.11                                        |
| <b>2033</b>           | 10.21                                  | 11.72                  | 18.30                                        | 9.63                            | 10.98                  | 15.93                                        |
| <b>2034</b>           | 12.73                                  | 14.98                  | 25.59                                        | 12.00                           | 14.03                  | 22.25                                        |
| <b>2035</b>           | 15.51                                  | 18.69                  | 34.94                                        | 14.62                           | 17.50                  | 30.32                                        |
| <b>2036</b>           | 18.53                                  | 22.83                  | 46.56                                        | 17.47                           | 21.38                  | 40.35                                        |
| <b>2037</b>           | 21.77                                  | 27.37                  | 60.58                                        | 20.53                           | 25.63                  | 52.41                                        |
| <b>2038</b>           | 25.20                                  | 32.27                  | 76.97                                        | 23.77                           | 30.22                  | 66.48                                        |
| <b>2039</b>           | 28.79                                  | 37.47                  | 95.59                                        | 27.16                           | 35.09                  | 82.42                                        |
| <b>2040</b>           | 32.52                                  | 42.94                  | 116.16                                       | 30.67                           | 40.21                  | 100.00                                       |
| <b>2041</b>           | 36.36                                  | 48.62                  | 138.39                                       | 34.29                           | 45.52                  | 118.95                                       |
| <b>2042</b>           | 40.29                                  | 54.47                  | 161.95                                       | 38.00                           | 51.00                  | 139.02                                       |
| <b>2043</b>           | 44.28                                  | 60.46                  | 186.57                                       | 41.77                           | 56.60                  | 159.94                                       |
| <b>2044</b>           | 48.34                                  | 66.56                  | 211.98                                       | 45.60                           | 62.30                  | 181.52                                       |
| <b>2045</b>           | 52.44                                  | 72.74                  | 237.99                                       | 49.47                           | 68.09                  | 203.58                                       |
| <b>2046</b>           | 56.58                                  | 78.99                  | 264.45                                       | 53.37                           | 73.93                  | 226.00                                       |
| <b>2047</b>           | 60.75                                  | 85.29                  | 291.22                                       | 57.30                           | 79.82                  | 248.67                                       |
| <b>2048</b>           | 64.94                                  | 91.63                  | 318.23                                       | 61.25                           | 85.75                  | 271.53                                       |
| <b>2049</b>           | 69.14                                  | 98.00                  | 345.41                                       | 65.21                           | 91.71                  | 294.52                                       |
| <b>2050</b>           | 73.36                                  | 104.39                 | 372.70                                       | 69.19                           | 97.68                  | 317.60                                       |
| <b>2051</b>           | 73.36                                  | 104.39                 | 400.00                                       | 69.19                           | 97.68                  | 340.68                                       |
| <b>2052</b>           | 73.36                                  | 104.39                 | 426.51                                       | 69.19                           | 97.68                  | 363.07                                       |
| <b>2053</b>           | 73.36                                  | 104.39                 | 452.70                                       | 69.19                           | 97.68                  | 385.19                                       |
| <b>2054</b>           | 73.36                                  | 104.39                 | 478.44                                       | 69.19                           | 97.68                  | 406.91                                       |
| <b>2055</b>           | 73.36                                  | 104.39                 | 503.57                                       | 69.19                           | 97.68                  | 428.10                                       |



|      |       |        |        |       |       |        |
|------|-------|--------|--------|-------|-------|--------|
| 2056 | 73.36 | 104.39 | 527.85 | 69.19 | 97.68 | 448.55 |
| 2057 | 73.36 | 104.39 | 551.02 | 69.19 | 97.68 | 468.05 |
| 2058 | 73.36 | 104.39 | 572.77 | 69.19 | 97.68 | 486.31 |
| 2059 | 73.36 | 104.39 | 592.77 | 69.19 | 97.68 | 503.07 |
| 2060 | 73.36 | 104.39 | 610.72 | 69.19 | 97.68 | 518.08 |
| 2061 | 73.36 | 104.39 | 626.40 | 69.19 | 97.68 | 531.13 |
| 2062 | 73.36 | 104.39 | 639.67 | 69.19 | 97.68 | 542.15 |
| 2063 | 73.36 | 104.39 | 650.57 | 69.19 | 97.68 | 551.16 |
| 2064 | 73.36 | 104.39 | 659.25 | 69.19 | 97.68 | 558.30 |
| 2065 | 73.36 | 104.39 | 665.98 | 69.19 | 97.68 | 563.80 |
| 2066 | 73.36 | 104.39 | 671.05 | 69.19 | 97.68 | 567.93 |
| 2067 | 73.36 | 104.39 | 674.78 | 69.19 | 97.68 | 570.94 |
| 2068 | 73.36 | 104.39 | 677.46 | 69.19 | 97.68 | 573.10 |
| 2069 | 73.36 | 104.39 | 679.34 | 69.19 | 97.68 | 574.60 |
| 2070 | 73.36 | 104.39 | 680.63 | 69.19 | 97.68 | 575.62 |
| 2071 | 73.36 | 104.39 | 681.47 | 69.19 | 97.68 | 576.28 |
| 2072 | 73.36 | 104.39 | 681.99 | 69.19 | 97.68 | 576.69 |
| 2073 | 73.36 | 104.39 | 682.27 | 69.19 | 97.68 | 576.91 |
| 2074 | 73.36 | 104.39 | 682.39 | 69.19 | 97.68 | 577.01 |
| 2075 | 73.36 | 104.39 | 682.39 | 69.19 | 97.68 | 577.01 |

**Table S31.** The emissions avoided between 2027 and 2075 for each policy scenario and fossil fuel diesel substitution and diesel pool substitution cases based on the Newfoundland & Labrador values. All values are provided in MtCO<sub>2</sub>eq.

| Newfoundland & Labrador |                                 |                 |                                       |                          |                 |                                       |
|-------------------------|---------------------------------|-----------------|---------------------------------------|--------------------------|-----------------|---------------------------------------|
|                         | Fossil Fuel Diesel Substitution |                 |                                       | Diesel Pool Substitution |                 |                                       |
| Year                    | Existing Policy Scenario        | Growth Scenario | Continued Policy Development Scenario | Existing Policy Scenario | Growth Scenario | Continued Policy Development Scenario |
| 2027                    | 1.26                            | 1.26            | 1.26                                  | 1.21                     | 1.21            | 1.16                                  |
| 2028                    | 2.79                            | 2.85            | 3.00                                  | 2.69                     | 2.73            | 2.77                                  |
| 2029                    | 4.65                            | 4.83            | 5.43                                  | 4.48                     | 4.64            | 4.99                                  |
| 2030                    | 6.86                            | 7.29            | 8.76                                  | 6.61                     | 6.99            | 8.04                                  |
| 2031                    | 9.46                            | 10.28           | 13.29                                 | 9.11                     | 9.86            | 12.18                                 |
| 2032                    | 12.45                           | 13.85           | 19.38                                 | 11.99                    | 13.28           | 17.74                                 |
| 2033                    | 15.84                           | 18.04           | 27.44                                 | 15.26                    | 17.30           | 25.06                                 |
| 2034                    | 19.62                           | 22.87           | 37.88                                 | 18.90                    | 21.92           | 34.53                                 |
| 2035                    | 23.77                           | 28.33           | 51.08                                 | 22.89                    | 27.14           | 46.47                                 |
| 2036                    | 28.26                           | 34.38           | 67.35                                 | 27.21                    | 32.93           | 61.14                                 |
| 2037                    | 33.05                           | 40.98           | 86.80                                 | 31.81                    | 39.25           | 78.63                                 |
| 2038                    | 38.10                           | 48.07           | 109.39                                | 36.67                    | 46.02           | 98.89                                 |
| 2039                    | 43.37                           | 55.57           | 134.89                                | 41.73                    | 53.18           | 121.72                                |
| 2040                    | 48.82                           | 63.41           | 162.97                                | 46.97                    | 60.68           | 146.80                                |
| 2041                    | 54.42                           | 71.55           | 193.20                                | 52.35                    | 68.45           | 173.76                                |
| 2042                    | 60.14                           | 79.91           | 225.17                                | 57.85                    | 76.44           | 202.23                                |
| 2043                    | 65.96                           | 88.46           | 258.50                                | 63.45                    | 84.60           | 231.87                                |

|      |        |        |        |        |        |        |
|------|--------|--------|--------|--------|--------|--------|
| 2044 | 71.86  | 97.16  | 292.86 | 69.11  | 92.90  | 262.40 |
| 2045 | 77.82  | 105.97 | 328.01 | 74.84  | 101.31 | 293.60 |
| 2046 | 83.82  | 114.86 | 363.72 | 80.61  | 109.80 | 325.27 |
| 2047 | 89.87  | 123.83 | 399.85 | 86.42  | 118.36 | 357.30 |
| 2048 | 95.94  | 132.84 | 436.28 | 92.25  | 126.96 | 389.58 |
| 2049 | 102.03 | 141.90 | 472.93 | 98.10  | 135.60 | 422.04 |
| 2050 | 108.14 | 150.98 | 509.73 | 103.98 | 144.27 | 454.63 |
| 2051 | 108.14 | 150.98 | 546.54 | 103.98 | 144.27 | 487.21 |
| 2052 | 108.14 | 150.98 | 582.08 | 103.98 | 144.27 | 518.64 |
| 2053 | 108.14 | 150.98 | 617.14 | 103.98 | 144.27 | 549.62 |
| 2054 | 108.14 | 150.98 | 651.52 | 103.98 | 144.27 | 579.99 |
| 2055 | 108.14 | 150.98 | 684.99 | 103.98 | 144.27 | 609.52 |
| 2056 | 108.14 | 150.98 | 717.26 | 103.98 | 144.27 | 637.97 |
| 2057 | 108.14 | 150.98 | 747.97 | 103.98 | 144.27 | 665.00 |
| 2058 | 108.14 | 150.98 | 776.72 | 103.98 | 144.27 | 690.26 |
| 2059 | 108.14 | 150.98 | 803.08 | 103.98 | 144.27 | 713.38 |
| 2060 | 108.14 | 150.98 | 826.67 | 103.98 | 144.27 | 734.03 |
| 2061 | 108.14 | 150.98 | 847.21 | 103.98 | 144.27 | 751.95 |
| 2062 | 108.14 | 150.98 | 864.56 | 103.98 | 144.27 | 767.04 |
| 2063 | 108.14 | 150.98 | 878.77 | 103.98 | 144.27 | 779.36 |
| 2064 | 108.14 | 150.98 | 890.07 | 103.98 | 144.27 | 789.12 |
| 2065 | 108.14 | 150.98 | 898.80 | 103.98 | 144.27 | 796.63 |
| 2066 | 108.14 | 150.98 | 905.38 | 103.98 | 144.27 | 802.26 |
| 2067 | 108.14 | 150.98 | 910.21 | 103.98 | 144.27 | 806.38 |
| 2068 | 108.14 | 150.98 | 913.68 | 103.98 | 144.27 | 809.32 |
| 2069 | 108.14 | 150.98 | 916.11 | 103.98 | 144.27 | 811.38 |
| 2070 | 108.14 | 150.98 | 917.77 | 103.98 | 144.27 | 812.77 |
| 2071 | 108.14 | 150.98 | 918.86 | 103.98 | 144.27 | 813.68 |
| 2072 | 108.14 | 150.98 | 919.54 | 103.98 | 144.27 | 814.24 |
| 2073 | 108.14 | 150.98 | 919.91 | 103.98 | 144.27 | 814.55 |
| 2074 | 108.14 | 150.98 | 920.06 | 103.98 | 144.27 | 814.67 |
| 2075 | 108.14 | 150.98 | 920.06 | 103.98 | 144.27 | 814.67 |

**Table S32.** The emissions avoided between 2027 and 2075 for each policy scenario and fossil fuel diesel substitution and diesel pool substitution cases based on the Prince Edward Island values. All values are provided in MtCO<sub>2</sub>eq.

| Prince Edward Island |                                 |                 |                                       |                          |                 |                                       |
|----------------------|---------------------------------|-----------------|---------------------------------------|--------------------------|-----------------|---------------------------------------|
|                      | Fossil Fuel Diesel Substitution |                 |                                       | Diesel Pool Substitution |                 |                                       |
| Year                 | Existing Policy Scenario        | Growth Scenario | Continued Policy Development Scenario | Existing Policy Scenario | Growth Scenario | Continued Policy Development Scenario |
| 2027                 | 1.10                            | 1.10            | 1.10                                  | 1.06                     | 1.05            | 1.00                                  |
| 2028                 | 2.45                            | 2.50            | 2.64                                  | 2.35                     | 2.39            | 2.40                                  |
| 2029                 | 4.08                            | 4.25            | 4.77                                  | 3.92                     | 4.05            | 4.33                                  |
| 2030                 | 6.03                            | 6.41            | 7.70                                  | 5.78                     | 6.11            | 6.99                                  |
| 2031                 | 8.31                            | 9.03            | 11.70                                 | 7.96                     | 8.61            | 10.59                                 |

|      |       |        |        |       |        |        |
|------|-------|--------|--------|-------|--------|--------|
| 2032 | 10.93 | 12.17  | 17.07  | 10.48 | 11.60  | 15.43  |
| 2033 | 13.91 | 15.86  | 24.18  | 13.33 | 15.11  | 21.80  |
| 2034 | 17.23 | 20.10  | 33.38  | 16.51 | 19.15  | 30.04  |
| 2035 | 20.87 | 24.89  | 45.03  | 19.99 | 23.70  | 40.42  |
| 2036 | 24.81 | 30.20  | 59.36  | 23.75 | 28.75  | 53.15  |
| 2037 | 29.00 | 35.98  | 76.49  | 27.76 | 34.24  | 68.32  |
| 2038 | 33.41 | 42.18  | 96.36  | 31.98 | 40.13  | 85.86  |
| 2039 | 38.01 | 48.74  | 118.77 | 36.38 | 46.35  | 105.60 |
| 2040 | 42.77 | 55.59  | 143.41 | 40.93 | 52.86  | 127.24 |
| 2041 | 47.66 | 62.70  | 169.92 | 45.60 | 59.60  | 150.48 |
| 2042 | 52.65 | 70.00  | 197.97 | 50.37 | 66.53  | 175.03 |
| 2043 | 57.73 | 77.47  | 227.26 | 55.22 | 73.61  | 200.63 |
| 2044 | 62.89 | 85.07  | 257.50 | 60.14 | 80.82  | 227.04 |
| 2045 | 68.09 | 92.78  | 288.47 | 65.11 | 88.12  | 254.06 |
| 2046 | 73.34 | 100.57 | 319.96 | 70.13 | 95.51  | 281.51 |
| 2047 | 78.63 | 108.42 | 351.84 | 75.18 | 102.95 | 309.29 |
| 2048 | 83.94 | 116.32 | 384.00 | 80.25 | 110.43 | 337.30 |
| 2049 | 89.27 | 124.25 | 416.36 | 85.34 | 117.95 | 365.47 |
| 2050 | 94.62 | 132.21 | 448.86 | 90.45 | 125.50 | 393.76 |
| 2051 | 94.62 | 132.21 | 481.37 | 90.45 | 125.50 | 422.05 |
| 2052 | 94.62 | 132.21 | 512.77 | 90.45 | 125.50 | 449.33 |
| 2053 | 94.62 | 132.21 | 543.74 | 90.45 | 125.50 | 476.22 |
| 2054 | 94.62 | 132.21 | 574.11 | 90.45 | 125.50 | 502.58 |
| 2055 | 94.62 | 132.21 | 603.68 | 90.45 | 125.50 | 528.21 |
| 2056 | 94.62 | 132.21 | 632.19 | 90.45 | 125.50 | 552.90 |
| 2057 | 94.62 | 132.21 | 659.32 | 90.45 | 125.50 | 576.35 |
| 2058 | 94.62 | 132.21 | 684.72 | 90.45 | 125.50 | 598.26 |
| 2059 | 94.62 | 132.21 | 708.01 | 90.45 | 125.50 | 618.32 |
| 2060 | 94.62 | 132.21 | 728.87 | 90.45 | 125.50 | 636.22 |
| 2061 | 94.62 | 132.21 | 747.04 | 90.45 | 125.50 | 651.78 |
| 2062 | 94.62 | 132.21 | 762.42 | 90.45 | 125.50 | 664.90 |
| 2063 | 94.62 | 132.21 | 775.05 | 90.45 | 125.50 | 675.64 |
| 2064 | 94.62 | 132.21 | 785.15 | 90.45 | 125.50 | 684.19 |
| 2065 | 94.62 | 132.21 | 793.01 | 90.45 | 125.50 | 690.84 |
| 2066 | 94.62 | 132.21 | 799.01 | 90.45 | 125.50 | 695.89 |
| 2067 | 94.62 | 132.21 | 803.46 | 90.45 | 125.50 | 699.62 |
| 2068 | 94.62 | 132.21 | 806.67 | 90.45 | 125.50 | 702.31 |
| 2069 | 94.62 | 132.21 | 808.93 | 90.45 | 125.50 | 704.19 |
| 2070 | 94.62 | 132.21 | 810.47 | 90.45 | 125.50 | 705.46 |
| 2071 | 94.62 | 132.21 | 811.48 | 90.45 | 125.50 | 706.29 |
| 2072 | 94.62 | 132.21 | 812.10 | 90.45 | 125.50 | 706.80 |
| 2073 | 94.62 | 132.21 | 812.45 | 90.45 | 125.50 | 707.09 |
| 2074 | 94.62 | 132.21 | 812.59 | 90.45 | 125.50 | 707.20 |
| 2075 | 94.62 | 132.21 | 812.59 | 90.45 | 125.50 | 707.20 |

**Table S33.** The emissions avoided between 2027 and 2075 for each policy scenario and fossil fuel diesel substitution and diesel pool substitution cases based on the Nova Scotia values. All values are provided in MtCO<sub>2</sub>eq.

| <b>Nova Scotia</b> |                                        |                        |                                              |                                 |                        |                                              |
|--------------------|----------------------------------------|------------------------|----------------------------------------------|---------------------------------|------------------------|----------------------------------------------|
|                    | <b>Fossil Fuel Diesel Substitution</b> |                        |                                              | <b>Diesel Pool Substitution</b> |                        |                                              |
| <b>Year</b>        | <b>Existing Policy Scenario</b>        | <b>Growth Scenario</b> | <b>Continued Policy Development Scenario</b> | <b>Existing Policy Scenario</b> | <b>Growth Scenario</b> | <b>Continued Policy Development Scenario</b> |
| <b>2027</b>        | -0.86                                  | -0.86                  | -0.86                                        | -0.90                           | -0.91                  | -0.96                                        |
| <b>2028</b>        | -1.88                                  | -1.91                  | -2.00                                        | -1.98                           | -2.02                  | -2.24                                        |
| <b>2029</b>        | -3.06                                  | -3.15                  | -3.44                                        | -3.23                           | -3.35                  | -3.87                                        |
| <b>2030</b>        | -4.38                                  | -4.57                  | -5.19                                        | -4.62                           | -4.87                  | -5.91                                        |
| <b>2031</b>        | -5.81                                  | -6.15                  | -7.26                                        | -6.16                           | -6.57                  | -8.37                                        |
| <b>2032</b>        | -7.35                                  | -7.86                  | -9.62                                        | -7.81                           | -8.43                  | -11.26                                       |
| <b>2033</b>        | -8.97                                  | -9.69                  | -12.21                                       | -9.55                           | -10.44                 | -14.59                                       |
| <b>2034</b>        | -10.64                                 | -11.60                 | -14.99                                       | -11.37                          | -12.56                 | -18.34                                       |
| <b>2035</b>        | -12.37                                 | -13.58                 | -17.85                                       | -13.25                          | -14.76                 | -22.46                                       |
| <b>2036</b>        | -14.12                                 | -15.59                 | -20.68                                       | -15.17                          | -17.04                 | -26.89                                       |
| <b>2037</b>        | -15.88                                 | -17.61                 | -23.37                                       | -17.12                          | -19.35                 | -31.54                                       |
| <b>2038</b>        | -17.66                                 | -19.64                 | -25.83                                       | -19.09                          | -21.69                 | -36.33                                       |
| <b>2039</b>        | -19.43                                 | -21.66                 | -28.01                                       | -21.07                          | -24.04                 | -41.18                                       |
| <b>2040</b>        | -21.20                                 | -23.66                 | -29.88                                       | -23.05                          | -26.40                 | -46.04                                       |
| <b>2041</b>        | -22.97                                 | -25.65                 | -31.45                                       | -25.03                          | -28.75                 | -50.89                                       |
| <b>2042</b>        | -24.73                                 | -27.62                 | -32.76                                       | -27.02                          | -31.09                 | -55.70                                       |
| <b>2043</b>        | -26.48                                 | -29.57                 | -33.85                                       | -29.00                          | -33.43                 | -60.47                                       |
| <b>2044</b>        | -28.23                                 | -31.51                 | -34.75                                       | -30.98                          | -35.76                 | -65.21                                       |
| <b>2045</b>        | -29.98                                 | -33.43                 | -35.52                                       | -32.96                          | -38.09                 | -69.93                                       |
| <b>2046</b>        | -31.72                                 | -35.35                 | -36.19                                       | -34.93                          | -40.41                 | -74.63                                       |
| <b>2047</b>        | -33.46                                 | -37.26                 | -36.77                                       | -36.91                          | -42.73                 | -79.32                                       |
| <b>2048</b>        | -35.19                                 | -39.17                 | -37.30                                       | -38.88                          | -45.05                 | -84.00                                       |
| <b>2049</b>        | -36.92                                 | -41.07                 | -37.79                                       | -40.85                          | -47.36                 | -88.68                                       |
| <b>2050</b>        | -38.66                                 | -42.97                 | -38.25                                       | -42.82                          | -49.68                 | -93.36                                       |
| <b>2051</b>        | -38.66                                 | -42.97                 | -38.71                                       | -42.82                          | -49.68                 | -98.03                                       |
| <b>2052</b>        | -38.66                                 | -42.97                 | -38.31                                       | -42.82                          | -49.68                 | -101.75                                      |
| <b>2053</b>        | -38.66                                 | -42.97                 | -37.64                                       | -42.82                          | -49.68                 | -105.15                                      |
| <b>2054</b>        | -38.66                                 | -42.97                 | -36.66                                       | -42.82                          | -49.68                 | -108.19                                      |
| <b>2055</b>        | -38.66                                 | -42.97                 | -35.36                                       | -42.82                          | -49.68                 | -110.83                                      |
| <b>2056</b>        | -38.66                                 | -42.97                 | -33.75                                       | -42.82                          | -49.68                 | -113.04                                      |
| <b>2057</b>        | -38.66                                 | -42.97                 | -31.86                                       | -42.82                          | -49.68                 | -114.83                                      |
| <b>2058</b>        | -38.66                                 | -42.97                 | -29.72                                       | -42.82                          | -49.68                 | -116.18                                      |
| <b>2059</b>        | -38.66                                 | -42.97                 | -27.40                                       | -42.82                          | -49.68                 | -117.10                                      |
| <b>2060</b>        | -38.66                                 | -42.97                 | -25.01                                       | -42.82                          | -49.68                 | -117.65                                      |
| <b>2061</b>        | -38.66                                 | -42.97                 | -22.64                                       | -42.82                          | -49.68                 | -117.90                                      |
| <b>2062</b>        | -38.66                                 | -42.97                 | -20.40                                       | -42.82                          | -49.68                 | -117.92                                      |
| <b>2063</b>        | -38.66                                 | -42.97                 | -18.40                                       | -42.82                          | -49.68                 | -117.81                                      |
| <b>2064</b>        | -38.66                                 | -42.97                 | -16.68                                       | -42.82                          | -49.68                 | -117.63                                      |

|      |        |        |        |        |        |         |
|------|--------|--------|--------|--------|--------|---------|
| 2065 | -38.66 | -42.97 | -15.27 | -42.82 | -49.68 | -117.45 |
| 2066 | -38.66 | -42.97 | -14.16 | -42.82 | -49.68 | -117.28 |
| 2067 | -38.66 | -42.97 | -13.31 | -42.82 | -49.68 | -117.15 |
| 2068 | -38.66 | -42.97 | -12.69 | -42.82 | -49.68 | -117.05 |
| 2069 | -38.66 | -42.97 | -12.24 | -42.82 | -49.68 | -116.98 |
| 2070 | -38.66 | -42.97 | -11.93 | -42.82 | -49.68 | -116.94 |
| 2071 | -38.66 | -42.97 | -11.73 | -42.82 | -49.68 | -116.91 |
| 2072 | -38.66 | -42.97 | -11.60 | -42.82 | -49.68 | -116.90 |
| 2073 | -38.66 | -42.97 | -11.53 | -42.82 | -49.68 | -116.89 |
| 2074 | -38.66 | -42.97 | -11.50 | -42.82 | -49.68 | -116.89 |
| 2075 | -38.66 | -42.97 | -11.50 | -42.82 | -49.68 | -116.89 |

**Table S34.** The emissions avoided between 2027 and 2075 for each policy scenario and fossil fuel diesel substitution and diesel pool substitution cases based on the New Brunswick values. All values are provided in MtCO<sub>2</sub>eq.

| New Brunswick |                                 |                 |                                       |                          |                 |                                       |
|---------------|---------------------------------|-----------------|---------------------------------------|--------------------------|-----------------|---------------------------------------|
|               | Fossil Fuel Diesel Substitution |                 |                                       | Diesel Pool Substitution |                 |                                       |
| Year          | Existing Policy Scenario        | Growth Scenario | Continued Policy Development Scenario | Existing Policy Scenario | Growth Scenario | Continued Policy Development Scenario |
| 2027          | 1.03                            | 1.03            | 1.03                                  | 0.98                     | 0.98            | 0.93                                  |
| 2028          | 2.29                            | 2.34            | 2.47                                  | 2.19                     | 2.22            | 2.23                                  |
| 2029          | 3.83                            | 3.98            | 4.48                                  | 3.66                     | 3.79            | 4.05                                  |
| 2030          | 5.67                            | 6.03            | 7.28                                  | 5.42                     | 5.74            | 6.57                                  |
| 2031          | 7.84                            | 8.54            | 11.14                                 | 7.50                     | 8.13            | 10.03                                 |
| 2032          | 10.37                           | 11.58           | 16.38                                 | 9.91                     | 11.01           | 14.74                                 |
| 2033          | 13.25                           | 15.17           | 23.40                                 | 12.67                    | 14.42           | 21.03                                 |
| 2034          | 16.49                           | 19.33           | 32.59                                 | 15.76                    | 18.38           | 29.24                                 |
| 2035          | 20.06                           | 24.07           | 44.32                                 | 19.18                    | 22.89           | 39.71                                 |
| 2036          | 23.95                           | 29.36           | 58.90                                 | 22.89                    | 27.91           | 52.69                                 |
| 2037          | 28.11                           | 35.16           | 76.45                                 | 26.87                    | 33.42           | 68.27                                 |
| 2038          | 32.51                           | 41.41           | 96.93                                 | 31.08                    | 39.36           | 86.43                                 |
| 2039          | 37.12                           | 48.04           | 120.15                                | 35.49                    | 45.66           | 106.98                                |
| 2040          | 41.90                           | 55.01           | 145.79                                | 40.06                    | 52.27           | 129.62                                |
| 2041          | 46.82                           | 62.24           | 173.46                                | 44.76                    | 59.14           | 154.02                                |
| 2042          | 51.86                           | 69.69           | 202.80                                | 49.57                    | 66.21           | 179.86                                |
| 2043          | 56.99                           | 77.32           | 233.47                                | 54.48                    | 73.46           | 206.85                                |
| 2044          | 62.20                           | 85.10           | 265.18                                | 59.45                    | 80.84           | 234.72                                |
| 2045          | 67.47                           | 92.99           | 297.66                                | 64.49                    | 88.33           | 263.25                                |
| 2046          | 72.78                           | 100.96          | 330.70                                | 69.57                    | 95.90           | 292.25                                |
| 2047          | 78.14                           | 109.01          | 364.16                                | 74.69                    | 103.54          | 321.61                                |
| 2048          | 83.52                           | 117.10          | 397.92                                | 79.83                    | 111.22          | 351.22                                |
| 2049          | 88.92                           | 125.23          | 431.89                                | 84.99                    | 118.94          | 381.00                                |
| 2050          | 94.34                           | 133.40          | 466.01                                | 90.18                    | 126.68          | 410.91                                |
| 2051          | 94.34                           | 133.40          | 500.14                                | 90.18                    | 126.68          | 440.82                                |
| 2052          | 94.34                           | 133.40          | 533.23                                | 90.18                    | 126.68          | 469.80                                |

|      |       |        |        |       |        |        |
|------|-------|--------|--------|-------|--------|--------|
| 2053 | 94.34 | 133.40 | 565.92 | 90.18 | 126.68 | 498.41 |
| 2054 | 94.34 | 133.40 | 598.03 | 90.18 | 126.68 | 526.50 |
| 2055 | 94.34 | 133.40 | 629.36 | 90.18 | 126.68 | 553.89 |
| 2056 | 94.34 | 133.40 | 659.63 | 90.18 | 126.68 | 580.33 |
| 2057 | 94.34 | 133.40 | 688.51 | 90.18 | 126.68 | 605.54 |
| 2058 | 94.34 | 133.40 | 715.62 | 90.18 | 126.68 | 629.16 |
| 2059 | 94.34 | 133.40 | 740.55 | 90.18 | 126.68 | 650.86 |
| 2060 | 94.34 | 133.40 | 762.94 | 90.18 | 126.68 | 670.30 |
| 2061 | 94.34 | 133.40 | 782.49 | 90.18 | 126.68 | 687.23 |
| 2062 | 94.34 | 133.40 | 799.07 | 90.18 | 126.68 | 701.55 |
| 2063 | 94.34 | 133.40 | 812.71 | 90.18 | 126.68 | 713.30 |
| 2064 | 94.34 | 133.40 | 823.62 | 90.18 | 126.68 | 722.67 |
| 2065 | 94.34 | 133.40 | 832.11 | 90.18 | 126.68 | 729.93 |
| 2066 | 94.34 | 133.40 | 838.56 | 90.18 | 126.68 | 735.44 |
| 2067 | 94.34 | 133.40 | 843.35 | 90.18 | 126.68 | 739.51 |
| 2068 | 94.34 | 133.40 | 846.80 | 90.18 | 126.68 | 742.44 |
| 2069 | 94.34 | 133.40 | 849.22 | 90.18 | 126.68 | 744.48 |
| 2070 | 94.34 | 133.40 | 850.86 | 90.18 | 126.68 | 745.86 |
| 2071 | 94.34 | 133.40 | 851.94 | 90.18 | 126.68 | 746.76 |
| 2072 | 94.34 | 133.40 | 852.61 | 90.18 | 126.68 | 747.31 |
| 2073 | 94.34 | 133.40 | 852.98 | 90.18 | 126.68 | 747.62 |
| 2074 | 94.34 | 133.40 | 853.13 | 90.18 | 126.68 | 747.75 |
| 2075 | 94.34 | 133.40 | 853.13 | 90.18 | 126.68 | 747.75 |

**Table S35.** The emissions avoided between 2027 and 2075 for each policy scenario and fossil fuel diesel substitution and diesel pool substitution cases based on the Quebec values. All values are provided in MtCO<sub>2</sub>eq.

| Quebec |                                 |                 |                                       |                          |                 |                                       |
|--------|---------------------------------|-----------------|---------------------------------------|--------------------------|-----------------|---------------------------------------|
| Year   | Fossil Fuel Diesel Substitution |                 |                                       | Diesel Pool Substitution |                 |                                       |
|        | Existing Policy Scenario        | Growth Scenario | Continued Policy Development Scenario | Existing Policy Scenario | Growth Scenario | Continued Policy Development Scenario |
| 2027   | 1.27                            | 1.27            | 1.27                                  | 1.23                     | 1.22            | 1.17                                  |
| 2028   | 2.82                            | 2.88            | 3.04                                  | 2.72                     | 2.76            | 2.80                                  |
| 2029   | 4.70                            | 4.89            | 5.48                                  | 4.53                     | 4.69            | 5.05                                  |
| 2030   | 6.93                            | 7.37            | 8.85                                  | 6.69                     | 7.07            | 8.13                                  |
| 2031   | 9.55                            | 10.38           | 13.42                                 | 9.21                     | 9.96            | 12.32                                 |
| 2032   | 12.57                           | 13.99           | 19.57                                 | 12.12                    | 13.42           | 17.93                                 |
| 2033   | 16.00                           | 18.22           | 27.69                                 | 15.42                    | 17.48           | 25.32                                 |
| 2034   | 19.82                           | 23.10           | 38.22                                 | 19.09                    | 22.14           | 34.87                                 |
| 2035   | 24.01                           | 28.60           | 51.53                                 | 23.12                    | 27.41           | 46.92                                 |
| 2036   | 28.54                           | 34.71           | 67.92                                 | 27.48                    | 33.26           | 61.70                                 |
| 2037   | 33.37                           | 41.36           | 87.51                                 | 32.13                    | 39.62           | 79.34                                 |
| 2038   | 38.46                           | 48.51           | 110.26                                | 37.03                    | 46.45           | 99.77                                 |
| 2039   | 43.77                           | 56.07           | 135.94                                | 42.14                    | 53.68           | 122.77                                |
| 2040   | 49.27                           | 63.98           | 164.21                                | 47.42                    | 61.24           | 148.04                                |

|      |        |        |        |        |        |        |
|------|--------|--------|--------|--------|--------|--------|
| 2041 | 54.92  | 72.18  | 194.64 | 52.86  | 69.08  | 175.21 |
| 2042 | 60.69  | 80.61  | 226.82 | 58.40  | 77.13  | 203.89 |
| 2043 | 66.56  | 89.23  | 260.37 | 64.04  | 85.36  | 233.75 |
| 2044 | 72.50  | 97.99  | 294.96 | 69.76  | 93.73  | 264.50 |
| 2045 | 78.51  | 106.87 | 330.33 | 75.53  | 102.21 | 295.92 |
| 2046 | 84.57  | 115.83 | 366.28 | 81.35  | 110.77 | 327.83 |
| 2047 | 90.66  | 124.86 | 402.64 | 87.21  | 119.39 | 360.09 |
| 2048 | 96.78  | 133.95 | 439.30 | 93.09  | 128.07 | 392.60 |
| 2049 | 102.93 | 143.07 | 476.18 | 99.00  | 136.78 | 425.29 |
| 2050 | 109.09 | 152.23 | 513.22 | 104.92 | 145.52 | 458.12 |
| 2051 | 109.09 | 152.23 | 550.26 | 104.92 | 145.52 | 490.94 |
| 2052 | 109.09 | 152.23 | 586.03 | 104.92 | 145.52 | 522.59 |
| 2053 | 109.09 | 152.23 | 621.30 | 104.92 | 145.52 | 553.78 |
| 2054 | 109.09 | 152.23 | 655.89 | 104.92 | 145.52 | 584.36 |
| 2055 | 109.09 | 152.23 | 689.56 | 104.92 | 145.52 | 614.10 |
| 2056 | 109.09 | 152.23 | 722.03 | 104.92 | 145.52 | 642.73 |
| 2057 | 109.09 | 152.23 | 752.92 | 104.92 | 145.52 | 669.94 |
| 2058 | 109.09 | 152.23 | 781.83 | 104.92 | 145.52 | 695.37 |
| 2059 | 109.09 | 152.23 | 808.34 | 104.92 | 145.52 | 718.64 |
| 2060 | 109.09 | 152.23 | 832.07 | 104.92 | 145.52 | 739.42 |
| 2061 | 109.09 | 152.23 | 852.72 | 104.92 | 145.52 | 757.45 |
| 2062 | 109.09 | 152.23 | 870.16 | 104.92 | 145.52 | 772.64 |
| 2063 | 109.09 | 152.23 | 884.45 | 104.92 | 145.52 | 785.03 |
| 2064 | 109.09 | 152.23 | 895.80 | 104.92 | 145.52 | 794.85 |
| 2065 | 109.09 | 152.23 | 904.58 | 104.92 | 145.52 | 802.40 |
| 2066 | 109.09 | 152.23 | 911.18 | 104.92 | 145.52 | 808.06 |
| 2067 | 109.09 | 152.23 | 916.04 | 104.92 | 145.52 | 812.20 |
| 2068 | 109.09 | 152.23 | 919.53 | 104.92 | 145.52 | 815.16 |
| 2069 | 109.09 | 152.23 | 921.97 | 104.92 | 145.52 | 817.23 |
| 2070 | 109.09 | 152.23 | 923.64 | 104.92 | 145.52 | 818.63 |
| 2071 | 109.09 | 152.23 | 924.73 | 104.92 | 145.52 | 819.55 |
| 2072 | 109.09 | 152.23 | 925.41 | 104.92 | 145.52 | 820.11 |
| 2073 | 109.09 | 152.23 | 925.78 | 104.92 | 145.52 | 820.42 |
| 2074 | 109.09 | 152.23 | 925.94 | 104.92 | 145.52 | 820.55 |
| 2075 | 109.09 | 152.23 | 925.94 | 104.92 | 145.52 | 820.55 |

**Table S36.** The emissions avoided between 2027 and 2075 for each policy scenario and fossil fuel diesel substitution and diesel pool substitution cases based on the Ontario values. All values are provided in MtCO<sub>2</sub>eq.

| Ontario |                                 |                 |                                       |                          |                 |                                       |
|---------|---------------------------------|-----------------|---------------------------------------|--------------------------|-----------------|---------------------------------------|
| Year    | Fossil Fuel Diesel Substitution |                 |                                       | Diesel Pool Substitution |                 |                                       |
|         | Existing Policy Scenario        | Growth Scenario | Continued Policy Development Scenario | Existing Policy Scenario | Growth Scenario | Continued Policy Development Scenario |
| 2027    | 1.10                            | 1.10            | 1.10                                  | 1.06                     | 1.05            | 1.00                                  |
| 2028    | 2.45                            | 2.50            | 2.64                                  | 2.35                     | 2.38            | 2.40                                  |

|      |       |        |        |       |        |        |
|------|-------|--------|--------|-------|--------|--------|
| 2029 | 4.09  | 4.25   | 4.78   | 3.92  | 4.06   | 4.34   |
| 2030 | 6.04  | 6.43   | 7.75   | 5.79  | 6.13   | 7.03   |
| 2031 | 8.35  | 9.09   | 11.82  | 8.01  | 8.67   | 10.72  |
| 2032 | 11.03 | 12.30  | 17.35  | 10.57 | 11.73  | 15.71  |
| 2033 | 14.08 | 16.09  | 24.71  | 13.49 | 15.34  | 22.34  |
| 2034 | 17.49 | 20.47  | 34.31  | 16.76 | 19.52  | 30.96  |
| 2035 | 21.25 | 25.44  | 46.51  | 20.37 | 24.25  | 41.89  |
| 2036 | 25.32 | 30.97  | 61.58  | 24.27 | 29.52  | 55.36  |
| 2037 | 29.68 | 37.00  | 79.64  | 28.44 | 35.26  | 71.47  |
| 2038 | 34.27 | 43.49  | 100.66 | 32.84 | 41.44  | 90.16  |
| 2039 | 39.07 | 50.37  | 124.41 | 37.44 | 47.99  | 111.24 |
| 2040 | 44.04 | 57.57  | 150.58 | 42.20 | 54.84  | 134.42 |
| 2041 | 49.15 | 65.04  | 178.78 | 47.09 | 61.95  | 159.34 |
| 2042 | 54.38 | 72.73  | 208.60 | 52.09 | 69.26  | 185.67 |
| 2043 | 59.69 | 80.59  | 239.71 | 57.18 | 76.73  | 213.08 |
| 2044 | 65.08 | 88.58  | 271.78 | 62.33 | 84.33  | 241.32 |
| 2045 | 70.52 | 96.68  | 304.59 | 67.54 | 92.03  | 270.18 |
| 2046 | 76.01 | 104.86 | 337.92 | 72.80 | 99.80  | 299.48 |
| 2047 | 81.53 | 113.11 | 371.65 | 78.08 | 107.64 | 329.10 |
| 2048 | 87.08 | 121.40 | 405.66 | 83.39 | 115.52 | 358.96 |
| 2049 | 92.65 | 129.73 | 439.87 | 88.72 | 123.43 | 388.98 |
| 2050 | 98.24 | 138.09 | 474.22 | 94.07 | 131.37 | 419.12 |
| 2051 | 98.24 | 138.09 | 508.58 | 94.07 | 131.37 | 449.26 |
| 2052 | 98.24 | 138.09 | 541.83 | 94.07 | 131.37 | 478.39 |
| 2053 | 98.24 | 138.09 | 574.65 | 94.07 | 131.37 | 507.14 |
| 2054 | 98.24 | 138.09 | 606.86 | 94.07 | 131.37 | 535.33 |
| 2055 | 98.24 | 138.09 | 638.25 | 94.07 | 131.37 | 562.78 |
| 2056 | 98.24 | 138.09 | 668.53 | 94.07 | 131.37 | 589.23 |
| 2057 | 98.24 | 138.09 | 697.36 | 94.07 | 131.37 | 614.38 |
| 2058 | 98.24 | 138.09 | 724.35 | 94.07 | 131.37 | 637.89 |
| 2059 | 98.24 | 138.09 | 749.11 | 94.07 | 131.37 | 659.41 |
| 2060 | 98.24 | 138.09 | 771.26 | 94.07 | 131.37 | 678.61 |
| 2061 | 98.24 | 138.09 | 790.55 | 94.07 | 131.37 | 695.28 |
| 2062 | 98.24 | 138.09 | 806.83 | 94.07 | 131.37 | 709.31 |
| 2063 | 98.24 | 138.09 | 820.17 | 94.07 | 131.37 | 720.76 |
| 2064 | 98.24 | 138.09 | 830.77 | 94.07 | 131.37 | 729.82 |
| 2065 | 98.24 | 138.09 | 838.96 | 94.07 | 131.37 | 736.78 |
| 2066 | 98.24 | 138.09 | 845.12 | 94.07 | 131.37 | 742.00 |
| 2067 | 98.24 | 138.09 | 849.65 | 94.07 | 131.37 | 745.81 |
| 2068 | 98.24 | 138.09 | 852.90 | 94.07 | 131.37 | 748.54 |
| 2069 | 98.24 | 138.09 | 855.18 | 94.07 | 131.37 | 750.44 |
| 2070 | 98.24 | 138.09 | 856.73 | 94.07 | 131.37 | 751.72 |
| 2071 | 98.24 | 138.09 | 857.75 | 94.07 | 131.37 | 752.56 |
| 2072 | 98.24 | 138.09 | 858.37 | 94.07 | 131.37 | 753.08 |
| 2073 | 98.24 | 138.09 | 858.72 | 94.07 | 131.37 | 753.36 |
| 2074 | 98.24 | 138.09 | 858.87 | 94.07 | 131.37 | 753.48 |



|             |       |        |        |       |        |        |
|-------------|-------|--------|--------|-------|--------|--------|
| <b>2075</b> | 98.24 | 138.09 | 858.87 | 94.07 | 131.37 | 753.48 |
|-------------|-------|--------|--------|-------|--------|--------|

**Table S37.** The emissions avoided between 2027 and 2075 for each policy scenario and fossil fuel diesel substitution and diesel pool substitution cases based on the Manitoba values. All values are provided in MtCO<sub>2</sub>eq.

| <b>Manitoba</b> |                                        |                        |                                              |                                 |                        |                                              |
|-----------------|----------------------------------------|------------------------|----------------------------------------------|---------------------------------|------------------------|----------------------------------------------|
|                 | <b>Fossil Fuel Diesel Substitution</b> |                        |                                              | <b>Diesel Pool Substitution</b> |                        |                                              |
| <b>Year</b>     | <b>Existing Policy Scenario</b>        | <b>Growth Scenario</b> | <b>Continued Policy Development Scenario</b> | <b>Existing Policy Scenario</b> | <b>Growth Scenario</b> | <b>Continued Policy Development Scenario</b> |
| <b>2027</b>     | 1.29                                   | 1.29                   | 1.29                                         | 1.24                            | 1.24                   | 1.19                                         |
| <b>2028</b>     | 2.87                                   | 2.92                   | 3.08                                         | 2.76                            | 2.81                   | 2.84                                         |
| <b>2029</b>     | 4.77                                   | 4.96                   | 5.56                                         | 4.60                            | 4.76                   | 5.13                                         |
| <b>2030</b>     | 7.03                                   | 7.47                   | 8.97                                         | 6.79                            | 7.18                   | 8.25                                         |
| <b>2031</b>     | 9.69                                   | 10.53                  | 13.60                                        | 9.34                            | 10.11                  | 12.50                                        |
| <b>2032</b>     | 12.75                                  | 14.18                  | 19.82                                        | 12.29                           | 13.61                  | 18.18                                        |
| <b>2033</b>     | 16.22                                  | 18.46                  | 28.04                                        | 15.63                           | 17.72                  | 25.66                                        |
| <b>2034</b>     | 20.08                                  | 23.40                  | 38.67                                        | 19.36                           | 22.44                  | 35.33                                        |
| <b>2035</b>     | 24.32                                  | 28.97                  | 52.12                                        | 23.44                           | 27.78                  | 47.51                                        |
| <b>2036</b>     | 28.91                                  | 35.14                  | 68.66                                        | 27.85                           | 33.69                  | 62.45                                        |
| <b>2037</b>     | 33.79                                  | 41.87                  | 88.44                                        | 32.55                           | 40.13                  | 80.26                                        |
| <b>2038</b>     | 38.94                                  | 49.09                  | 111.38                                       | 37.51                           | 47.03                  | 100.89                                       |
| <b>2039</b>     | 44.31                                  | 56.72                  | 137.28                                       | 42.68                           | 54.34                  | 124.11                                       |
| <b>2040</b>     | 49.87                                  | 64.71                  | 165.77                                       | 48.02                           | 61.98                  | 149.61                                       |
| <b>2041</b>     | 55.58                                  | 72.99                  | 196.44                                       | 53.52                           | 69.90                  | 177.01                                       |
| <b>2042</b>     | 61.41                                  | 81.51                  | 228.87                                       | 59.12                           | 78.03                  | 205.93                                       |
| <b>2043</b>     | 67.34                                  | 90.21                  | 262.67                                       | 64.83                           | 86.35                  | 236.04                                       |
| <b>2044</b>     | 73.35                                  | 99.06                  | 297.51                                       | 70.60                           | 94.80                  | 267.05                                       |
| <b>2045</b>     | 79.42                                  | 108.02                 | 333.14                                       | 76.44                           | 103.36                 | 298.73                                       |
| <b>2046</b>     | 85.54                                  | 117.07                 | 369.34                                       | 82.32                           | 112.00                 | 330.89                                       |
| <b>2047</b>     | 91.69                                  | 126.18                 | 405.96                                       | 88.24                           | 120.71                 | 363.41                                       |
| <b>2048</b>     | 97.87                                  | 135.35                 | 442.88                                       | 94.19                           | 129.47                 | 396.18                                       |
| <b>2049</b>     | 104.08                                 | 144.56                 | 480.02                                       | 100.15                          | 138.27                 | 429.13                                       |
| <b>2050</b>     | 110.31                                 | 153.80                 | 517.32                                       | 106.14                          | 147.09                 | 462.21                                       |
| <b>2051</b>     | 110.31                                 | 153.80                 | 554.62                                       | 106.14                          | 147.09                 | 495.30                                       |
| <b>2052</b>     | 110.31                                 | 153.80                 | 590.62                                       | 106.14                          | 147.09                 | 527.19                                       |
| <b>2053</b>     | 110.31                                 | 153.80                 | 626.13                                       | 106.14                          | 147.09                 | 558.62                                       |
| <b>2054</b>     | 110.31                                 | 153.80                 | 660.94                                       | 106.14                          | 147.09                 | 589.41                                       |
| <b>2055</b>     | 110.31                                 | 153.80                 | 694.83                                       | 106.14                          | 147.09                 | 619.37                                       |
| <b>2056</b>     | 110.31                                 | 153.80                 | 727.50                                       | 106.14                          | 147.09                 | 648.20                                       |
| <b>2057</b>     | 110.31                                 | 153.80                 | 758.58                                       | 106.14                          | 147.09                 | 675.60                                       |
| <b>2058</b>     | 110.31                                 | 153.80                 | 787.66                                       | 106.14                          | 147.09                 | 701.20                                       |
| <b>2059</b>     | 110.31                                 | 153.80                 | 814.31                                       | 106.14                          | 147.09                 | 724.62                                       |
| <b>2060</b>     | 110.31                                 | 153.80                 | 838.17                                       | 106.14                          | 147.09                 | 745.52                                       |
| <b>2061</b>     | 110.31                                 | 153.80                 | 858.92                                       | 106.14                          | 147.09                 | 763.65                                       |
| <b>2062</b>     | 110.31                                 | 153.80                 | 876.44                                       | 106.14                          | 147.09                 | 778.92                                       |

|      |        |        |        |        |        |        |
|------|--------|--------|--------|--------|--------|--------|
| 2063 | 110.31 | 153.80 | 890.79 | 106.14 | 147.09 | 791.38 |
| 2064 | 110.31 | 153.80 | 902.19 | 106.14 | 147.09 | 801.24 |
| 2065 | 110.31 | 153.80 | 911.00 | 106.14 | 147.09 | 808.82 |
| 2066 | 110.31 | 153.80 | 917.62 | 106.14 | 147.09 | 814.51 |
| 2067 | 110.31 | 153.80 | 922.49 | 106.14 | 147.09 | 818.66 |
| 2068 | 110.31 | 153.80 | 925.99 | 106.14 | 147.09 | 821.63 |
| 2069 | 110.31 | 153.80 | 928.44 | 106.14 | 147.09 | 823.70 |
| 2070 | 110.31 | 153.80 | 930.11 | 106.14 | 147.09 | 825.11 |
| 2071 | 110.31 | 153.80 | 931.21 | 106.14 | 147.09 | 826.02 |
| 2072 | 110.31 | 153.80 | 931.88 | 106.14 | 147.09 | 826.59 |
| 2073 | 110.31 | 153.80 | 932.26 | 106.14 | 147.09 | 826.90 |
| 2074 | 110.31 | 153.80 | 932.41 | 106.14 | 147.09 | 827.02 |
| 2075 | 110.31 | 153.80 | 932.41 | 106.14 | 147.09 | 827.02 |

**Table S38.** The emissions avoided between 2027 and 2075 for each policy scenario and fossil fuel diesel substitution and diesel pool substitution cases based on the Saskatchewan values. All values are provided in MtCO<sub>2</sub>eq.

| Saskatchewan |                                 |                 |                                       |                          |                 |                                       |
|--------------|---------------------------------|-----------------|---------------------------------------|--------------------------|-----------------|---------------------------------------|
| Year         | Fossil Fuel Diesel Substitution |                 |                                       | Diesel Pool Substitution |                 |                                       |
|              | Existing Policy Scenario        | Growth Scenario | Continued Policy Development Scenario | Existing Policy Scenario | Growth Scenario | Continued Policy Development Scenario |
| 2027         | -0.46                           | -0.46           | -0.46                                 | -0.51                    | -0.51           | -0.56                                 |
| 2028         | -1.00                           | -1.02           | -1.06                                 | -1.10                    | -1.13           | -1.30                                 |
| 2029         | -1.62                           | -1.66           | -1.79                                 | -1.78                    | -1.85           | -2.22                                 |
| 2030         | -2.29                           | -2.37           | -2.63                                 | -2.54                    | -2.67           | -3.34                                 |
| 2031         | -3.00                           | -3.14           | -3.55                                 | -3.35                    | -3.56           | -4.65                                 |
| 2032         | -3.74                           | -3.93           | -4.47                                 | -4.19                    | -4.50           | -6.11                                 |
| 2033         | -4.48                           | -4.72           | -5.29                                 | -5.06                    | -5.46           | -7.66                                 |
| 2034         | -5.21                           | -5.48           | -5.87                                 | -5.93                    | -6.43           | -9.22                                 |
| 2035         | -5.91                           | -6.18           | -6.06                                 | -6.80                    | -7.37           | -10.68                                |
| 2036         | -6.58                           | -6.81           | -5.71                                 | -7.64                    | -8.26           | -11.92                                |
| 2037         | -7.22                           | -7.36           | -4.69                                 | -8.45                    | -9.10           | -12.86                                |
| 2038         | -7.81                           | -7.83           | -2.92                                 | -9.24                    | -9.88           | -13.42                                |
| 2039         | -8.36                           | -8.21           | -0.40                                 | -10.00                   | -10.60          | -13.57                                |
| 2040         | -8.88                           | -8.52           | 2.82                                  | -10.73                   | -11.26          | -13.34                                |
| 2041         | -9.37                           | -8.77           | 6.67                                  | -11.43                   | -11.87          | -12.76                                |
| 2042         | -9.83                           | -8.96           | 11.04                                 | -12.12                   | -12.44          | -11.89                                |
| 2043         | -10.27                          | -9.11           | 15.84                                 | -12.79                   | -12.97          | -10.78                                |
| 2044         | -10.69                          | -9.21           | 20.97                                 | -13.44                   | -13.47          | -9.49                                 |
| 2045         | -11.10                          | -9.29           | 26.35                                 | -14.08                   | -13.95          | -8.06                                 |
| 2046         | -11.50                          | -9.35           | 31.93                                 | -14.71                   | -14.41          | -6.52                                 |
| 2047         | -11.88                          | -9.38           | 37.63                                 | -15.33                   | -14.85          | -4.92                                 |
| 2048         | -12.26                          | -9.41           | 43.44                                 | -15.95                   | -15.29          | -3.26                                 |
| 2049         | -12.63                          | -9.42           | 49.33                                 | -16.56                   | -15.72          | -1.56                                 |
| 2050         | -13.00                          | -9.42           | 55.26                                 | -17.17                   | -16.14          | 0.16                                  |

|      |        |       |        |        |        |       |
|------|--------|-------|--------|--------|--------|-------|
| 2051 | -13.00 | -9.42 | 61.20  | -17.17 | -16.14 | 1.88  |
| 2052 | -13.00 | -9.42 | 67.59  | -17.17 | -16.14 | 4.16  |
| 2053 | -13.00 | -9.42 | 74.12  | -17.17 | -16.14 | 6.61  |
| 2054 | -13.00 | -9.42 | 80.79  | -17.17 | -16.14 | 9.26  |
| 2055 | -13.00 | -9.42 | 87.57  | -17.17 | -16.14 | 12.10 |
| 2056 | -13.00 | -9.42 | 94.42  | -17.17 | -16.14 | 15.13 |
| 2057 | -13.00 | -9.42 | 101.28 | -17.17 | -16.14 | 18.30 |
| 2058 | -13.00 | -9.42 | 108.03 | -17.17 | -16.14 | 21.57 |
| 2059 | -13.00 | -9.42 | 114.55 | -17.17 | -16.14 | 24.85 |
| 2060 | -13.00 | -9.42 | 120.68 | -17.17 | -16.14 | 28.03 |
| 2061 | -13.00 | -9.42 | 126.26 | -17.17 | -16.14 | 31.00 |
| 2062 | -13.00 | -9.42 | 131.17 | -17.17 | -16.14 | 33.65 |
| 2063 | -13.00 | -9.42 | 135.34 | -17.17 | -16.14 | 35.93 |
| 2064 | -13.00 | -9.42 | 138.76 | -17.17 | -16.14 | 37.80 |
| 2065 | -13.00 | -9.42 | 141.47 | -17.17 | -16.14 | 39.29 |
| 2066 | -13.00 | -9.42 | 143.55 | -17.17 | -16.14 | 40.43 |
| 2067 | -13.00 | -9.42 | 145.12 | -17.17 | -16.14 | 41.28 |
| 2068 | -13.00 | -9.42 | 146.25 | -17.17 | -16.14 | 41.89 |
| 2069 | -13.00 | -9.42 | 147.06 | -17.17 | -16.14 | 42.32 |
| 2070 | -13.00 | -9.42 | 147.61 | -17.17 | -16.14 | 42.60 |
| 2071 | -13.00 | -9.42 | 147.97 | -17.17 | -16.14 | 42.79 |
| 2072 | -13.00 | -9.42 | 148.20 | -17.17 | -16.14 | 42.90 |
| 2073 | -13.00 | -9.42 | 148.33 | -17.17 | -16.14 | 42.96 |
| 2074 | -13.00 | -9.42 | 148.38 | -17.17 | -16.14 | 42.99 |
| 2075 | -13.00 | -9.42 | 148.38 | -17.17 | -16.14 | 42.99 |

**Table S39.** The emissions avoided between 2027 and 2075 for each policy scenario and fossil fuel diesel substitution and diesel pool substitution cases based on the Alberta values. All values are provided in MtCO<sub>2</sub>eq.

| Alberta |                                 |                 |                                       |                          |                 |                                       |
|---------|---------------------------------|-----------------|---------------------------------------|--------------------------|-----------------|---------------------------------------|
|         | Fossil Fuel Diesel Substitution |                 |                                       | Diesel Pool Substitution |                 |                                       |
| Year    | Existing Policy Scenario        | Growth Scenario | Continued Policy Development Scenario | Existing Policy Scenario | Growth Scenario | Continued Policy Development Scenario |
| 2027    | -1.23                           | -1.23           | -1.23                                 | -1.28                    | -1.28           | -1.33                                 |
| 2028    | -2.71                           | -2.76           | -2.89                                 | -2.81                    | -2.87           | -3.13                                 |
| 2029    | -4.45                           | -4.60           | -5.07                                 | -4.62                    | -4.80           | -5.50                                 |
| 2030    | -6.45                           | -6.78           | -7.86                                 | -6.70                    | -7.08           | -8.57                                 |
| 2031    | -8.71                           | -9.31           | -11.38                                | -9.06                    | -9.73           | -12.48                                |
| 2032    | -11.22                          | -12.19          | -15.73                                | -11.68                   | -12.76          | -17.37                                |
| 2033    | -13.96                          | -15.42          | -21.03                                | -14.54                   | -16.16          | -23.40                                |
| 2034    | -16.91                          | -18.97          | -27.35                                | -17.63                   | -19.92          | -30.70                                |
| 2035    | -20.04                          | -22.82          | -34.75                                | -20.93                   | -24.00          | -39.36                                |
| 2036    | -23.34                          | -26.93          | -43.20                                | -24.40                   | -28.38          | -49.42                                |
| 2037    | -26.77                          | -31.27          | -52.67                                | -28.01                   | -33.01          | -60.84                                |
| 2038    | -30.31                          | -35.80          | -63.03                                | -31.75                   | -37.85          | -73.53                                |

|      |        |        |         |        |         |         |
|------|--------|--------|---------|--------|---------|---------|
| 2039 | -33.95 | -40.48 | -74.17  | -35.58 | -42.87  | -87.34  |
| 2040 | -37.65 | -45.29 | -85.91  | -39.49 | -48.02  | -102.08 |
| 2041 | -41.41 | -50.19 | -98.15  | -43.47 | -53.29  | -117.58 |
| 2042 | -45.21 | -55.17 | -110.75 | -47.49 | -58.64  | -133.68 |
| 2043 | -49.04 | -60.20 | -123.61 | -51.56 | -64.06  | -150.24 |
| 2044 | -52.90 | -65.27 | -136.67 | -55.65 | -69.53  | -167.13 |
| 2045 | -56.78 | -70.38 | -149.87 | -59.76 | -75.04  | -184.29 |
| 2046 | -60.68 | -75.52 | -163.18 | -63.89 | -80.58  | -201.62 |
| 2047 | -64.59 | -80.67 | -176.55 | -68.04 | -86.14  | -219.10 |
| 2048 | -68.50 | -85.84 | -189.97 | -72.19 | -91.72  | -236.67 |
| 2049 | -72.43 | -91.01 | -203.43 | -76.36 | -97.31  | -254.32 |
| 2050 | -76.36 | -96.20 | -216.92 | -80.53 | -102.91 | -272.02 |
| 2051 | -76.36 | -96.20 | -230.40 | -80.53 | -102.91 | -289.72 |
| 2052 | -76.36 | -96.20 | -242.65 | -80.53 | -102.91 | -306.09 |
| 2053 | -76.36 | -96.20 | -254.48 | -80.53 | -102.91 | -321.99 |
| 2054 | -76.36 | -96.20 | -265.79 | -80.53 | -102.91 | -337.32 |
| 2055 | -76.36 | -96.20 | -276.48 | -80.53 | -102.91 | -351.95 |
| 2056 | -76.36 | -96.20 | -286.45 | -80.53 | -102.91 | -365.75 |
| 2057 | -76.36 | -96.20 | -295.58 | -80.53 | -102.91 | -378.55 |
| 2058 | -76.36 | -96.20 | -303.77 | -80.53 | -102.91 | -390.23 |
| 2059 | -76.36 | -96.20 | -310.93 | -80.53 | -102.91 | -400.63 |
| 2060 | -76.36 | -96.20 | -317.02 | -80.53 | -102.91 | -409.67 |
| 2061 | -76.36 | -96.20 | -322.05 | -80.53 | -102.91 | -417.31 |
| 2062 | -76.36 | -96.20 | -326.07 | -80.53 | -102.91 | -423.59 |
| 2063 | -76.36 | -96.20 | -329.19 | -80.53 | -102.91 | -428.60 |
| 2064 | -76.36 | -96.20 | -331.55 | -80.53 | -102.91 | -432.50 |
| 2065 | -76.36 | -96.20 | -333.28 | -80.53 | -102.91 | -435.46 |
| 2066 | -76.36 | -96.20 | -334.53 | -80.53 | -102.91 | -437.65 |
| 2067 | -76.36 | -96.20 | -335.42 | -80.53 | -102.91 | -439.26 |
| 2068 | -76.36 | -96.20 | -336.04 | -80.53 | -102.91 | -440.40 |
| 2069 | -76.36 | -96.20 | -336.46 | -80.53 | -102.91 | -441.20 |
| 2070 | -76.36 | -96.20 | -336.75 | -80.53 | -102.91 | -441.75 |
| 2071 | -76.36 | -96.20 | -336.93 | -80.53 | -102.91 | -442.12 |
| 2072 | -76.36 | -96.20 | -337.05 | -80.53 | -102.91 | -442.34 |
| 2073 | -76.36 | -96.20 | -337.11 | -80.53 | -102.91 | -442.47 |
| 2074 | -76.36 | -96.20 | -337.13 | -80.53 | -102.91 | -442.52 |
| 2075 | -76.36 | -96.20 | -337.13 | -80.53 | -102.91 | -442.52 |

**Table S40.** The emissions avoided between 2027 and 2075 for each policy scenario and fossil fuel diesel substitution and diesel pool substitution cases based on the British Columbia values. All values are provided in MtCO<sub>2</sub>eq.

| British Columbia |                                 |                 |                                       |                          |                 |                                       |
|------------------|---------------------------------|-----------------|---------------------------------------|--------------------------|-----------------|---------------------------------------|
|                  | Fossil Fuel Diesel Substitution |                 |                                       | Diesel Pool Substitution |                 |                                       |
| Year             | Existing Policy Scenario        | Growth Scenario | Continued Policy Development Scenario | Existing Policy Scenario | Growth Scenario | Continued Policy Development Scenario |

|      |       |        |        |       |        |        |
|------|-------|--------|--------|-------|--------|--------|
| 2027 | 1.15  | 1.15   | 1.15   | 1.10  | 1.10   | 1.05   |
| 2028 | 2.56  | 2.60   | 2.75   | 2.46  | 2.49   | 2.51   |
| 2029 | 4.26  | 4.42   | 4.97   | 4.09  | 4.23   | 4.53   |
| 2030 | 6.28  | 6.67   | 8.02   | 6.03  | 6.38   | 7.31   |
| 2031 | 8.66  | 9.41   | 12.18  | 8.31  | 8.99   | 11.08  |
| 2032 | 11.40 | 12.69  | 17.79  | 10.94 | 12.12  | 16.14  |
| 2033 | 14.51 | 16.53  | 25.21  | 13.92 | 15.79  | 22.83  |
| 2034 | 17.98 | 20.97  | 34.83  | 17.25 | 20.02  | 31.49  |
| 2035 | 21.79 | 25.99  | 47.03  | 20.90 | 24.80  | 42.42  |
| 2036 | 25.91 | 31.55  | 62.06  | 24.85 | 30.10  | 55.85  |
| 2037 | 30.30 | 37.62  | 80.06  | 29.07 | 35.88  | 71.89  |
| 2038 | 34.94 | 44.14  | 100.98 | 33.51 | 42.09  | 90.49  |
| 2039 | 39.78 | 51.04  | 124.62 | 38.14 | 48.66  | 111.45 |
| 2040 | 44.79 | 58.27  | 150.65 | 42.94 | 55.53  | 134.48 |
| 2041 | 49.94 | 65.76  | 178.69 | 47.87 | 62.66  | 159.25 |
| 2042 | 55.20 | 73.46  | 208.35 | 52.91 | 69.99  | 185.41 |
| 2043 | 60.55 | 81.34  | 239.28 | 58.03 | 77.48  | 212.66 |
| 2044 | 65.97 | 89.35  | 271.18 | 63.22 | 85.10  | 240.72 |
| 2045 | 71.45 | 97.47  | 303.81 | 68.47 | 92.81  | 269.40 |
| 2046 | 76.97 | 105.66 | 336.97 | 73.76 | 100.60 | 298.52 |
| 2047 | 82.53 | 113.92 | 370.51 | 79.07 | 108.45 | 327.96 |
| 2048 | 88.11 | 122.23 | 404.34 | 84.42 | 116.35 | 357.64 |
| 2049 | 93.71 | 130.58 | 438.37 | 89.78 | 124.28 | 387.48 |
| 2050 | 99.33 | 138.95 | 472.55 | 95.17 | 132.24 | 417.44 |
| 2051 | 99.33 | 138.95 | 506.72 | 95.17 | 132.24 | 447.40 |
| 2052 | 99.33 | 138.95 | 539.75 | 95.17 | 132.24 | 476.31 |
| 2053 | 99.33 | 138.95 | 572.32 | 95.17 | 132.24 | 504.81 |
| 2054 | 99.33 | 138.95 | 604.28 | 95.17 | 132.24 | 532.75 |
| 2055 | 99.33 | 138.95 | 635.40 | 95.17 | 132.24 | 559.93 |
| 2056 | 99.33 | 138.95 | 665.41 | 95.17 | 132.24 | 586.12 |
| 2057 | 99.33 | 138.95 | 693.98 | 95.17 | 132.24 | 611.01 |
| 2058 | 99.33 | 138.95 | 720.74 | 95.17 | 132.24 | 634.28 |
| 2059 | 99.33 | 138.95 | 745.29 | 95.17 | 132.24 | 655.59 |
| 2060 | 99.33 | 138.95 | 767.26 | 95.17 | 132.24 | 674.62 |
| 2061 | 99.33 | 138.95 | 786.40 | 95.17 | 132.24 | 691.14 |
| 2062 | 99.33 | 138.95 | 802.58 | 95.17 | 132.24 | 705.06 |
| 2063 | 99.33 | 138.95 | 815.84 | 95.17 | 132.24 | 716.42 |
| 2064 | 99.33 | 138.95 | 826.38 | 95.17 | 132.24 | 725.42 |
| 2065 | 99.33 | 138.95 | 834.52 | 95.17 | 132.24 | 732.35 |
| 2066 | 99.33 | 138.95 | 840.66 | 95.17 | 132.24 | 737.54 |
| 2067 | 99.33 | 138.95 | 845.17 | 95.17 | 132.24 | 741.34 |
| 2068 | 99.33 | 138.95 | 848.41 | 95.17 | 132.24 | 744.05 |
| 2069 | 99.33 | 138.95 | 850.68 | 95.17 | 132.24 | 745.94 |
| 2070 | 99.33 | 138.95 | 852.23 | 95.17 | 132.24 | 747.23 |
| 2071 | 99.33 | 138.95 | 853.25 | 95.17 | 132.24 | 748.07 |
| 2072 | 99.33 | 138.95 | 853.88 | 95.17 | 132.24 | 748.58 |

|             |       |        |        |       |        |        |
|-------------|-------|--------|--------|-------|--------|--------|
| <b>2073</b> | 99.33 | 138.95 | 854.23 | 95.17 | 132.24 | 748.86 |
| <b>2074</b> | 99.33 | 138.95 | 854.37 | 95.17 | 132.24 | 748.98 |
| <b>2075</b> | 99.33 | 138.95 | 854.37 | 95.17 | 132.24 | 748.98 |

**Table S41.** The emissions avoided between 2027 and 2075 for each policy scenario and fossil fuel diesel substitution and diesel pool substitution cases based on the Yukon values. All values are provided in MtCO<sub>2</sub>eq.

| <b>Yukon</b> |                                        |                        |                                              |                                 |                        |                                              |
|--------------|----------------------------------------|------------------------|----------------------------------------------|---------------------------------|------------------------|----------------------------------------------|
|              | <b>Fossil Fuel Diesel Substitution</b> |                        |                                              | <b>Diesel Pool Substitution</b> |                        |                                              |
| <b>Year</b>  | <b>Existing Policy Scenario</b>        | <b>Growth Scenario</b> | <b>Continued Policy Development Scenario</b> | <b>Existing Policy Scenario</b> | <b>Growth Scenario</b> | <b>Continued Policy Development Scenario</b> |
| <b>2027</b>  | 0.97                                   | 0.97                   | 0.97                                         | 0.93                            | 0.92                   | 0.87                                         |
| <b>2028</b>  | 2.17                                   | 2.21                   | 2.34                                         | 2.07                            | 2.10                   | 2.10                                         |
| <b>2029</b>  | 3.63                                   | 3.78                   | 4.26                                         | 3.46                            | 3.58                   | 3.82                                         |
| <b>2030</b>  | 5.38                                   | 5.73                   | 6.93                                         | 5.13                            | 5.43                   | 6.22                                         |
| <b>2031</b>  | 7.45                                   | 8.13                   | 10.63                                        | 7.11                            | 7.71                   | 9.52                                         |
| <b>2032</b>  | 9.86                                   | 11.02                  | 15.65                                        | 9.40                            | 10.45                  | 14.01                                        |
| <b>2033</b>  | 12.61                                  | 14.45                  | 22.36                                        | 12.02                           | 13.70                  | 19.99                                        |
| <b>2034</b>  | 15.69                                  | 18.42                  | 31.14                                        | 14.97                           | 17.47                  | 27.80                                        |
| <b>2035</b>  | 19.09                                  | 22.94                  | 42.34                                        | 18.21                           | 21.75                  | 37.73                                        |
| <b>2036</b>  | 22.79                                  | 27.97                  | 56.23                                        | 21.73                           | 26.52                  | 50.01                                        |
| <b>2037</b>  | 26.75                                  | 33.48                  | 72.94                                        | 25.51                           | 31.74                  | 64.77                                        |
| <b>2038</b>  | 30.93                                  | 39.42                  | 92.45                                        | 29.50                           | 37.37                  | 81.95                                        |
| <b>2039</b>  | 35.31                                  | 45.73                  | 114.57                                       | 33.67                           | 43.35                  | 101.40                                       |
| <b>2040</b>  | 39.85                                  | 52.35                  | 139.00                                       | 38.01                           | 49.62                  | 122.84                                       |
| <b>2041</b>  | 44.53                                  | 59.23                  | 165.40                                       | 42.46                           | 56.13                  | 145.96                                       |
| <b>2042</b>  | 49.32                                  | 66.32                  | 193.37                                       | 47.03                           | 62.84                  | 170.44                                       |
| <b>2043</b>  | 54.19                                  | 73.57                  | 222.58                                       | 51.67                           | 69.71                  | 195.95                                       |
| <b>2044</b>  | 59.13                                  | 80.95                  | 252.73                                       | 56.39                           | 76.70                  | 222.27                                       |
| <b>2045</b>  | 64.13                                  | 88.44                  | 283.58                                       | 61.15                           | 83.78                  | 249.17                                       |
| <b>2046</b>  | 69.17                                  | 96.00                  | 314.96                                       | 65.95                           | 90.94                  | 276.51                                       |
| <b>2047</b>  | 74.24                                  | 103.62                 | 346.71                                       | 70.79                           | 98.15                  | 304.16                                       |
| <b>2048</b>  | 79.34                                  | 111.30                 | 378.73                                       | 75.65                           | 105.41                 | 332.03                                       |
| <b>2049</b>  | 84.46                                  | 119.00                 | 410.95                                       | 80.53                           | 112.71                 | 360.06                                       |
| <b>2050</b>  | 89.60                                  | 126.74                 | 443.31                                       | 85.43                           | 120.02                 | 388.21                                       |
| <b>2051</b>  | 89.60                                  | 126.74                 | 475.67                                       | 85.43                           | 120.02                 | 416.35                                       |
| <b>2052</b>  | 89.60                                  | 126.74                 | 507.06                                       | 85.43                           | 120.02                 | 443.62                                       |
| <b>2053</b>  | 89.60                                  | 126.74                 | 538.06                                       | 85.43                           | 120.02                 | 470.54                                       |
| <b>2054</b>  | 89.60                                  | 126.74                 | 568.50                                       | 85.43                           | 120.02                 | 496.97                                       |
| <b>2055</b>  | 89.60                                  | 126.74                 | 598.18                                       | 85.43                           | 120.02                 | 522.72                                       |
| <b>2056</b>  | 89.60                                  | 126.74                 | 626.85                                       | 85.43                           | 120.02                 | 547.56                                       |
| <b>2057</b>  | 89.60                                  | 126.74                 | 654.19                                       | 85.43                           | 120.02                 | 571.22                                       |
| <b>2058</b>  | 89.60                                  | 126.74                 | 679.84                                       | 85.43                           | 120.02                 | 593.38                                       |
| <b>2059</b>  | 89.60                                  | 126.74                 | 703.42                                       | 85.43                           | 120.02                 | 613.72                                       |
| <b>2060</b>  | 89.60                                  | 126.74                 | 724.58                                       | 85.43                           | 120.02                 | 631.94                                       |

|      |       |        |        |       |        |        |
|------|-------|--------|--------|-------|--------|--------|
| 2061 | 89.60 | 126.74 | 743.06 | 85.43 | 120.02 | 647.80 |
| 2062 | 89.60 | 126.74 | 758.71 | 85.43 | 120.02 | 661.19 |
| 2063 | 89.60 | 126.74 | 771.56 | 85.43 | 120.02 | 672.15 |
| 2064 | 89.60 | 126.74 | 781.80 | 85.43 | 120.02 | 680.85 |
| 2065 | 89.60 | 126.74 | 789.73 | 85.43 | 120.02 | 687.55 |
| 2066 | 89.60 | 126.74 | 795.69 | 85.43 | 120.02 | 692.57 |
| 2067 | 89.60 | 126.74 | 800.08 | 85.43 | 120.02 | 696.25 |
| 2068 | 89.60 | 126.74 | 803.24 | 85.43 | 120.02 | 698.87 |
| 2069 | 89.60 | 126.74 | 805.45 | 85.43 | 120.02 | 700.71 |
| 2070 | 89.60 | 126.74 | 806.95 | 85.43 | 120.02 | 701.95 |
| 2071 | 89.60 | 126.74 | 807.94 | 85.43 | 120.02 | 702.76 |
| 2072 | 89.60 | 126.74 | 808.55 | 85.43 | 120.02 | 703.26 |
| 2073 | 89.60 | 126.74 | 808.89 | 85.43 | 120.02 | 703.53 |
| 2074 | 89.60 | 126.74 | 809.03 | 85.43 | 120.02 | 703.64 |
| 2075 | 89.60 | 126.74 | 809.03 | 85.43 | 120.02 | 703.64 |

**Table S42.** The emissions avoided between 2027 and 2075 for each policy scenario and fossil fuel diesel substitution and diesel pool substitution cases based on the Northwest Territories values. All values are provided in MtCO<sub>2</sub>eq.

| Northwest Territories |                                 |                 |                                       |                          |                 |                                       |
|-----------------------|---------------------------------|-----------------|---------------------------------------|--------------------------|-----------------|---------------------------------------|
| Year                  | Fossil Fuel Diesel Substitution |                 |                                       | Diesel Pool Substitution |                 |                                       |
|                       | Existing Policy Scenario        | Growth Scenario | Continued Policy Development Scenario | Existing Policy Scenario | Growth Scenario | Continued Policy Development Scenario |
| 2027                  | 0.14                            | 0.14            | 0.14                                  | 0.09                     | 0.09            | 0.04                                  |
| 2028                  | 0.32                            | 0.33            | 0.36                                  | 0.22                     | 0.22            | 0.12                                  |
| 2029                  | 0.57                            | 0.61            | 0.74                                  | 0.41                     | 0.42            | 0.31                                  |
| 2030                  | 0.92                            | 1.01            | 1.37                                  | 0.67                     | 0.72            | 0.65                                  |
| 2031                  | 1.36                            | 1.56            | 2.36                                  | 1.01                     | 1.14            | 1.26                                  |
| 2032                  | 1.92                            | 2.29            | 3.87                                  | 1.46                     | 1.72            | 2.22                                  |
| 2033                  | 2.61                            | 3.21            | 6.07                                  | 2.02                     | 2.47            | 3.70                                  |
| 2034                  | 3.43                            | 4.36            | 9.20                                  | 2.70                     | 3.41            | 5.85                                  |
| 2035                  | 4.37                            | 5.74            | 13.44                                 | 3.49                     | 4.56            | 8.83                                  |
| 2036                  | 5.45                            | 7.36            | 19.00                                 | 4.39                     | 5.91            | 12.79                                 |
| 2037                  | 6.64                            | 9.19            | 25.99                                 | 5.40                     | 7.45            | 17.82                                 |
| 2038                  | 7.94                            | 11.23           | 34.45                                 | 6.51                     | 9.18            | 23.95                                 |
| 2039                  | 9.34                            | 13.46           | 44.32                                 | 7.70                     | 11.07           | 31.15                                 |
| 2040                  | 10.81                           | 15.84           | 55.50                                 | 8.96                     | 13.11           | 39.33                                 |
| 2041                  | 12.36                           | 18.36           | 67.80                                 | 10.29                    | 15.26           | 48.36                                 |
| 2042                  | 13.96                           | 21.00           | 81.00                                 | 11.67                    | 17.52           | 58.07                                 |
| 2043                  | 15.61                           | 23.72           | 94.93                                 | 13.09                    | 19.86           | 68.30                                 |
| 2044                  | 17.29                           | 26.51           | 109.40                                | 14.54                    | 22.25           | 78.94                                 |
| 2045                  | 19.00                           | 29.36           | 124.28                                | 16.02                    | 24.70           | 89.87                                 |
| 2046                  | 20.74                           | 32.24           | 139.46                                | 17.52                    | 27.18           | 101.01                                |
| 2047                  | 22.49                           | 35.17           | 154.86                                | 19.04                    | 29.70           | 112.31                                |
| 2048                  | 24.25                           | 38.11           | 170.42                                | 20.57                    | 32.23           | 123.72                                |

|      |       |       |        |       |       |        |
|------|-------|-------|--------|-------|-------|--------|
| 2049 | 26.03 | 41.08 | 186.10 | 22.10 | 34.78 | 135.21 |
| 2050 | 27.82 | 44.06 | 201.86 | 23.65 | 37.35 | 146.76 |
| 2051 | 27.82 | 44.06 | 217.62 | 23.65 | 37.35 | 158.30 |
| 2052 | 27.82 | 44.06 | 233.24 | 23.65 | 37.35 | 169.81 |
| 2053 | 27.82 | 44.06 | 248.78 | 23.65 | 37.35 | 181.27 |
| 2054 | 27.82 | 44.06 | 264.16 | 23.65 | 37.35 | 192.63 |
| 2055 | 27.82 | 44.06 | 279.29 | 23.65 | 37.35 | 203.82 |
| 2056 | 27.82 | 44.06 | 294.06 | 23.65 | 37.35 | 214.77 |
| 2057 | 27.82 | 44.06 | 308.32 | 23.65 | 37.35 | 225.34 |
| 2058 | 27.82 | 44.06 | 321.87 | 23.65 | 37.35 | 235.41 |
| 2059 | 27.82 | 44.06 | 334.51 | 23.65 | 37.35 | 244.81 |
| 2060 | 27.82 | 44.06 | 346.02 | 23.65 | 37.35 | 253.37 |
| 2061 | 27.82 | 44.06 | 356.22 | 23.65 | 37.35 | 260.96 |
| 2062 | 27.82 | 44.06 | 365.00 | 23.65 | 37.35 | 267.48 |
| 2063 | 27.82 | 44.06 | 372.30 | 23.65 | 37.35 | 272.89 |
| 2064 | 27.82 | 44.06 | 378.18 | 23.65 | 37.35 | 277.23 |
| 2065 | 27.82 | 44.06 | 382.76 | 23.65 | 37.35 | 280.59 |
| 2066 | 27.82 | 44.06 | 386.23 | 23.65 | 37.35 | 283.11 |
| 2067 | 27.82 | 44.06 | 388.78 | 23.65 | 37.35 | 284.95 |
| 2068 | 27.82 | 44.06 | 390.62 | 23.65 | 37.35 | 286.26 |
| 2069 | 27.82 | 44.06 | 391.91 | 23.65 | 37.35 | 287.17 |
| 2070 | 27.82 | 44.06 | 392.79 | 23.65 | 37.35 | 287.78 |
| 2071 | 27.82 | 44.06 | 393.37 | 23.65 | 37.35 | 288.18 |
| 2072 | 27.82 | 44.06 | 393.72 | 23.65 | 37.35 | 288.43 |
| 2073 | 27.82 | 44.06 | 393.92 | 23.65 | 37.35 | 288.56 |
| 2074 | 27.82 | 44.06 | 394.00 | 23.65 | 37.35 | 288.61 |
| 2075 | 27.82 | 44.06 | 394.00 | 23.65 | 37.35 | 288.61 |

**Table S43.** The emissions avoided between 2027 and 2075 for each policy scenario and fossil fuel diesel substitution and diesel pool substitution cases based on the Nunavut values. All values are provided in MtCO<sub>2</sub>eq.

| Nunavut |                                 |                 |                                       |                          |                 |                                       |
|---------|---------------------------------|-----------------|---------------------------------------|--------------------------|-----------------|---------------------------------------|
|         | Fossil Fuel Diesel Substitution |                 |                                       | Diesel Pool Substitution |                 |                                       |
| Year    | Existing Policy Scenario        | Growth Scenario | Continued Policy Development Scenario | Existing Policy Scenario | Growth Scenario | Continued Policy Development Scenario |
| 2027    | -6.51                           | -6.51           | -6.51                                 | -6.55                    | -6.56           | -6.61                                 |
| 2028    | -14.43                          | -14.69          | -15.47                                | -14.53                   | -14.80          | -15.71                                |
| 2029    | -23.93                          | -24.82          | -27.65                                | -24.10                   | -25.02          | -28.09                                |
| 2030    | -35.13                          | -37.18          | -44.03                                | -35.38                   | -37.47          | -44.74                                |
| 2031    | -48.14                          | -52.00          | -65.79                                | -48.48                   | -52.42          | -66.89                                |
| 2032    | -62.99                          | -69.49          | -94.30                                | -63.44                   | -70.06          | -95.94                                |
| 2033    | -79.66                          | -89.76          | -131.08                               | -80.25                   | -90.51          | -133.45                               |
| 2034    | -98.09                          | -112.83         | -177.63                               | -98.82                   | -113.78         | -180.98                               |
| 2035    | -118.16                         | -138.61         | -235.26                               | -119.04                  | -139.79         | -239.88                               |
| 2036    | -139.70                         | -166.93         | -304.88                               | -140.76                  | -168.38         | -311.09                               |



|      |         |         |          |         |         |          |
|------|---------|---------|----------|---------|---------|----------|
| 2037 | -162.55 | -197.56 | -386.79  | -163.79 | -199.30 | -394.96  |
| 2038 | -186.52 | -230.21 | -480.62  | -187.95 | -232.26 | -491.11  |
| 2039 | -211.43 | -264.59 | -585.38  | -213.07 | -266.98 | -598.55  |
| 2040 | -237.13 | -300.41 | -699.69  | -238.98 | -303.15 | -715.86  |
| 2041 | -263.46 | -337.41 | -821.96  | -265.53 | -340.51 | -841.39  |
| 2042 | -290.31 | -375.36 | -950.61  | -292.59 | -378.84 | -973.54  |
| 2043 | -317.56 | -414.06 | -1084.22 | -320.08 | -417.92 | -1110.85 |
| 2044 | -345.15 | -453.35 | -1221.61 | -347.89 | -457.60 | -1252.07 |
| 2045 | -372.98 | -493.09 | -1361.80 | -375.96 | -497.75 | -1396.21 |
| 2046 | -401.02 | -533.20 | -1504.06 | -404.23 | -538.26 | -1542.50 |
| 2047 | -429.22 | -573.57 | -1647.82 | -432.67 | -579.04 | -1690.37 |
| 2048 | -457.53 | -614.16 | -1792.66 | -461.22 | -620.04 | -1839.36 |
| 2049 | -485.94 | -654.90 | -1938.29 | -489.87 | -661.20 | -1989.18 |
| 2050 | -514.43 | -695.77 | -2084.47 | -518.60 | -702.48 | -2139.58 |
| 2051 | -514.43 | -695.77 | -2230.66 | -518.60 | -702.48 | -2289.98 |
| 2052 | -514.43 | -695.77 | -2370.33 | -518.60 | -702.48 | -2433.77 |
| 2053 | -514.43 | -695.77 | -2507.56 | -518.60 | -702.48 | -2575.07 |
| 2054 | -514.43 | -695.77 | -2641.56 | -518.60 | -702.48 | -2713.09 |
| 2055 | -514.43 | -695.77 | -2771.37 | -518.60 | -702.48 | -2846.83 |
| 2056 | -514.43 | -695.77 | -2895.79 | -518.60 | -702.48 | -2975.09 |
| 2057 | -514.43 | -695.77 | -3013.46 | -518.60 | -702.48 | -3096.43 |
| 2058 | -514.43 | -695.77 | -3122.87 | -518.60 | -702.48 | -3209.32 |
| 2059 | -514.43 | -695.77 | -3222.50 | -518.60 | -702.48 | -3312.20 |
| 2060 | -514.43 | -695.77 | -3311.05 | -518.60 | -702.48 | -3403.70 |
| 2061 | -514.43 | -695.77 | -3387.62 | -518.60 | -702.48 | -3482.88 |
| 2062 | -514.43 | -695.77 | -3451.89 | -518.60 | -702.48 | -3549.41 |
| 2063 | -514.43 | -695.77 | -3504.25 | -518.60 | -702.48 | -3603.66 |
| 2064 | -514.43 | -695.77 | -3545.67 | -518.60 | -702.48 | -3646.62 |
| 2065 | -514.43 | -695.77 | -3577.54 | -518.60 | -702.48 | -3679.71 |
| 2066 | -514.43 | -695.77 | -3601.46 | -518.60 | -702.48 | -3704.58 |
| 2067 | -514.43 | -695.77 | -3618.99 | -518.60 | -702.48 | -3722.83 |
| 2068 | -514.43 | -695.77 | -3631.56 | -518.60 | -702.48 | -3735.92 |
| 2069 | -514.43 | -695.77 | -3640.36 | -518.60 | -702.48 | -3745.10 |
| 2070 | -514.43 | -695.77 | -3646.35 | -518.60 | -702.48 | -3751.36 |
| 2071 | -514.43 | -695.77 | -3650.28 | -518.60 | -702.48 | -3755.47 |
| 2072 | -514.43 | -695.77 | -3652.70 | -518.60 | -702.48 | -3758.00 |
| 2073 | -514.43 | -695.77 | -3654.04 | -518.60 | -702.48 | -3759.40 |
| 2074 | -514.43 | -695.77 | -3654.60 | -518.60 | -702.48 | -3759.99 |
| 2075 | -514.43 | -695.77 | -3654.60 | -518.60 | -702.48 | -3759.99 |

## References

[1] Rubin, E., & Rao, A. (2002). *A Technical, Economic and Environmental Assessment of Amine-based CO<sub>2</sub> Capture Technology for Power Plant Greenhouse Gas Control*. Retrieved from <https://www.osti.gov/servlets/purl/804932>.

- [2] Dimitriou, I., García-Gutiérrez, P., Elder, R. H., Cuéllar-Franca, R. M., Azapagic, A., & Allen, R. W. K. (2015). Carbon dioxide utilisation for production of transport fuels: process and economic analysis. *Energy Environ. Sci.*, 8(6), 1775–1789.
- [3] Bouchy, C., Hastoy, G., Guillon, E., & Martens, J. A. (2009). Fischer-Tropsch waxes upgrading via hydrocracking and selective hydroisomerization. *Oil and Gas Science and Technology*, 64(1), 91–112.
- [4] Peters, M. S., Timmerhaus, K. D., West, R. E., Timmerhaus, K., & West, R. (1968). *Plant design and economics for chemical engineers* (Vol. 4). Book, McGraw-Hill New York.
- [5] Hamelinck, C. N., Faaij, A. P. C., den Uil, H., & Boerrigter, H. (2004). Production of FT transportation fuels from biomass; technical options, process analysis and optimisation, and development potential. *Energy*, 29(11), 1743–1771.
- [6] Albrecht, F. G., König, D. H., Baucks, N., & Dietrich, R.-U. (2017). A standardized methodology for the techno-economic evaluation of alternative fuels—A case study. *Fuel*, 194, 511–526.
- [7] Brynolf, S., Taljegard, M., Grahn, M., & Hansson, J. (2018). Electrofuels for the transport sector: A review of production costs. *Renewable and Sustainable Energy Reviews*, 81, 1887–1905.
- [8] Ahmadi, L., Kannangara, M., & Bensebaa, F. (2020). Cost-effectiveness of small scale biomass supply chain and bioenergy production systems in carbon credit markets: A life cycle perspective. *Sustainable Energy Technologies and Assessments*, 37, 100627.
- [9] Mayyas, A., Ruth, M., Pivovar, B., Bender, G., and Wipke, K. (2019) Manufacturing Cost Analysis for Proton Exchange Membrane Water Electrolyzers, National Renewable Energy Laboratory.
- [10] Swanson, R. M., Platon, A., Satrio, J. A., Brown, R. C., & Hsu, D. D. (2010). *Techno-economic analysis of biofuels production based on gasification* (RPRT). National Renewable Energy Lab.(NREL), Golden, CO (United States).
- [11] Rafati, M., Wang, L., Dayton, D. C., Schimmel, K., Kabadi, V., & Shahbazi, A. (2017). Techno-economic analysis of production of Fischer-Tropsch liquids via biomass gasification: The effects of Fischer-Tropsch catalysts and natural gas co-feeding. *Energy Conversion and Management*, 133, 153–166. JOUR.
- [12] Garret, D. (2012). *Chemical engineering economics*. Springer.
- [13] Loh, H. P., Lyons, J., & White, C. W. (2002). *Process equipment cost estimation, final report* (RPRT). National Energy Technology Lab.(NETL), Morgantown, WV (United States).
- [14] Wernet, G., Bauer, C., Steubing, B., Reinhard, J., Moreno-Ruiz, E., & Weidema, B. (2016). The ecoinvent database version 3 (part I): overview and methodology. *The International Journal of Life Cycle Assessment*, 21(9), 1218–1230.
- [15] Canada Energy Regulator (2020) Canada’s Energy Future 2020: Energy Supply and Demand Projections to 2050. Government of Canada. <https://doi.org/10.35002/zjr8-8x75>

- [16] Sleep, S., Guo, J., Laurenzi, I. J., Bergerson, J. A., and MacLean, H. L. (2020). Quantifying Variability in Well-to-wheel Greenhouse Gas Emission Intensities of Transportation Fuels Derived from Canadian Oil Sands Mining Operations. *J. Clean. Prod.* 258, 120639.
- [17] Environment and Climate Change Canada (2019) Clean Fuel Standard: Proposed Regulatory Approach. Government of Canada. <https://www.canada.ca/en/environment-climate-change/services/managing-pollution/energy-production/fuel-regulations/clean-fuel-standard/regulatory-approach.html> [Accessed: 11 March 2021].
- [18] Organization of Public Services and Procurement Canada (2020) Canada Gazette, Part I, Volume 154, Number 51: Clean Fuel Regulations. Government of Canada. <https://gazette.gc.ca/rp-pr/p1/2020/2020-12-19/html/reg2-eng.html> [Accessed: 11 March 2021]
- [19] Canada Energy Regulator (2016) Energy Conversion Tables. Government of Canada <https://apps.cer-rec.gc.ca/Conversion/conversion-tables.aspx?GoCTemplateCulture=en-CA#s1ss1> [Accessed: 11 March 2021].
- [20] Statistics Canada (2007) The Canadian Productivity Review: Depreciation Rates for the Productivity Accounts, Government of Canada.
- [21] Treese, S. A., Pujadó, P. R., and Jones, D. S. J. (2015) Handbook of Petroleum Processing, ed. 2. Springer, Cham.
- [22] Energetics Incorporated (2006) Energy bandwidth for Petroleum Refining Processes. U.S. Department of Energy. <https://www.energy.gov/sites/prod/files/2013/11/f4/bandwidth.pdf> [Accessed: 11 March 2021].
- [23] Sapkota, K., Oni, A. O., Kumar, A., and Linwei, M. (2018) The Development of a Techno-Economic Model for the Extraction, Transportation, Upgrading, and Shipping of Canadian Oil Sands Products to the Asia-Pacific Region. *Appl. Energy* 223, 273-292.
- [24] Canada Energy Regulator (2020) Canada's Renewable Power Landscape 2017 – Energy Market Analysis. Government of Canada <https://www.cer-rec.gc.ca/en/data-analysis/energy-commodities/electricity/report/2017-canadian-renewable-power/canadas-renewable-power-landscape-2017-energy-market-analysis-ghg-emission.html> [Accessed: 11 March 2021].
- [25] IEA (2020) World Energy Balances. International Energy Agency. <https://doi.org/10.1787/enestats-data-en>
- [26] Zauner, A., Böhm, H., Rosenfeld, D. C., and Tichler, R. (2018). Innovative Large-scale Energy Storage Technologies and Power-to-Gas Concepts after Optimization: Report on Learning Curves and Economies of Scale.
- [27] National Energy Technology Laboratory (2013) Technology Learning Curve (FOAK to NOAK). U.S. Department of Energy.
- [28] Thomassen, G., Van Passel, S., and Dewulf, J. (2020) A Review on Learning Effects in Prospective Technology Assessment. *Renew. Sust.* 130, 109937.

[29] Schoots, K., Ferioli, F., Kramer, G. J., and Van der Zwaan, B. C. C. (2008) Learning Curves for Hydrogen Production Technology: An Assessment of Observed Cost Reductions. *Int. J. Hydrog.* 33(11), 2630-2645.

[30] Rubin, E. S., Yeh, S., Antes, M., Berkenpas, M., and Davison, J. (2007). Use of Experience Curves to Estimate the Future Cost of Power Plants with CO<sub>2</sub> Capture. *Int. J. Greenh. Control* 1(2), 188-197.

[31] Bradford, H. (2019) Canada: Biofuels Annual 2019, USDA Foreign Agriculture Service.  
<https://www.fas.usda.gov/data/canada-biofuels-annual-5> [Accessed: 11 March 2021].
